1 **Paired heavy and light chain signatures contribute to potent SARS-CoV-2 neutralization**  
2 **in public antibody responses**

3

4 **Authors:**

5 Bailey B. Banach<sup>1\*</sup>, Gabriele Cerutti<sup>2,8\*</sup>, Ahmed S. Fahad<sup>3</sup>, Chen-Hsiang Shen<sup>4</sup>, Matheus  
6 Oliveira de Souza<sup>3</sup>, Phinikoula S. Katsamba<sup>2,8</sup>, Yaroslav Tsybovsky<sup>5</sup>, Pengfei Wang<sup>6</sup>, Manoj S.  
7 Nair<sup>6</sup>, Yaoxing Huang<sup>6</sup>, Irene M. Francino Urdániz<sup>7</sup>, Paul J. Steiner<sup>7</sup>, Matias Gutiérrez-  
8 González<sup>3</sup>, Lihong Liu<sup>6</sup>, Sheila N. López Acevedo<sup>3</sup>, Alexandra Nazzari<sup>4</sup>, Jacy R. Wolfe<sup>3</sup>, Yang  
9 Luo<sup>6</sup>, Adam S. Olia<sup>4</sup>, I-Ting Teng<sup>4</sup>, Jian Yu<sup>2,6</sup>, Tongqing Zhou<sup>4</sup>, Eswar R. Reddem<sup>2,8</sup>, Jude  
10 Bimela<sup>2,8</sup>, Xiaoli Pan<sup>3</sup>, Bharat Madan<sup>3</sup>, Amy D. Laffin<sup>3</sup>, Rajani Nimrania<sup>3</sup>, Kwon-Tung Yuen<sup>9</sup>,  
11 Timothy A. Whitehead<sup>7</sup>, David D. Ho<sup>6</sup>, Peter D. Kwong<sup>4,2</sup>, Lawrence Shapiro<sup>2,6,8\*\*</sup>, & Brandon J.  
12 DeKosky<sup>1,3,10,\*\*</sup>

13

14 **Affiliations:**

15 <sup>1</sup>Bioengineering Graduate Program, University of Kansas, Lawrence, KS 66045, USA.  
16 <sup>2</sup>Department of Biochemistry and Molecular Biophysics, Columbia University, New York, NY 10032, USA.  
17 <sup>3</sup>Department of Pharmaceutical Chemistry, University of Kansas, Lawrence, KS 66045, USA.  
18 <sup>4</sup>Vaccine Research Center, National Institute of Allergy and Infectious Diseases, National Institutes of  
19 Health, Bethesda, MD 20892, USA.  
20 <sup>5</sup>Electron Microscopy Laboratory, Cancer Research Technology Program, Leidos Biomedical Research,  
21 Inc., Frederick National Laboratory for Cancer Research, Frederick, MD 21702, USA  
22 <sup>6</sup>Aaron Diamond AIDS Research Center, Columbia University Vagelos College of Physicians and  
23 Surgeons, New York, NY 10032, USA.  
24 <sup>7</sup>Department of Chemical and Biological Engineering, University of Colorado, Boulder, CO, 80305, USA.  
25 <sup>8</sup>Zuckerman Mind Brain Behavior Institute, Columbia University, New York, NY, USA  
26 <sup>9</sup>State Key Laboratory for Emerging Infectious Diseases, Department of Microbiology, Carol Yu Centre for  
27 Infection, Li Ka Shing Faculty of Medicine, The University of Hong Kong, Hong Kong Special  
28 Administrative Region, China. Department of Microbiology, Queen Mart Hospital, Hong Kong Special  
29 Administrative Region, Chin. Department of Clinical Microbiology and Infection Control, University of  
30 Hong Kong-Shenzhen Hospital, Shenzhen, China.  
31 <sup>10</sup>Department of Chemical Engineering, University of Kansas, Lawrence, KS 66045, USA.

32

33

34

35 \* These authors contributed equally to this work

36 \*\* Corresponding authors. Email: [dekosky@ku.edu](mailto:dekosky@ku.edu), [lss8@columbia.edu](mailto:lss8@columbia.edu)

37 **Summary:**

38 Understanding protective mechanisms of antibody recognition can inform vaccine and therapeutic  
39 strategies against SARS-CoV-2. We discovered a new antibody, 910-30, that targets the SARS-  
40 CoV-2 ACE2 receptor binding site as a member of a public antibody response encoded by IGHV3-  
41 53/IGHV3-66 genes. We performed sequence and structural analyses to explore how antibody  
42 features correlate with SARS-CoV-2 neutralization. Cryo-EM structures of 910-30 bound to the  
43 SARS-CoV-2 spike trimer revealed its binding interactions and ability to disassemble spike.  
44 Despite heavy chain sequence similarity, biophysical analyses of IGHV3-53/3-66 antibodies  
45 highlighted the importance of native heavy:light pairings for ACE2 binding competition and for  
46 SARS-CoV-2 neutralization. We defined paired heavy:light sequence signatures and determined  
47 antibody precursor prevalence to be ~1 in 44,000 human B cells, consistent with public antibody  
48 identification in several convalescent COVID-19 patients. These data reveal key structural and  
49 functional neutralization features in the IGHV3-53/3-66 public antibody class to accelerate  
50 antibody-based medical interventions against SARS-CoV-2.

51

52

53 **Keywords:**

54 SARS-CoV-2, public antibody, neutralization, yeast display

55 **Highlights:**

- 56 • A molecular study of IGHV3-53/3-66 public antibody responses reveals critical heavy and  
57 light chain features for potent neutralization
- 58 • Cryo-EM analyses detail the structure of a novel public antibody class member, antibody  
59 910-30, in complex with SARS-CoV-2 spike trimer
- 60 • Cryo-EM data reveal that 910-30 can both bind assembled trimer and can disassemble the  
61 SARS-CoV-2 spike
- 62 • Sequence-structure-function signatures defined for IGHV3-53/3-66 class antibodies  
63 including both heavy and light chains
- 64 • IGHV3-53/3-66 class precursors have a prevalence of 1:44,000 B cells in healthy human  
65 antibody repertoires

## 66 Introduction

67 SARS-CoV-2 emerged in late 2019 into human populations, causing coronavirus disease  
68 2019 (COVID-19) with complications including respiratory and cardiac failure in severe cases  
69 (Gorbalenya and et al., 2020; Guan et al., 2020; Jiang et al., 2020; Zhou et al., 2020a; Zhu et al.,  
70 2020). The highly infectious nature of SARS-CoV-2, significant prevalence of severe disease, and  
71 widespread transmission by asymptomatic and pre-symptomatic individuals has led to immense  
72 global, social, and economic disruption (Cucinotta and Vanelli, 2020; Liu et al., 2020b). SARS-  
73 CoV-2 marks the third known emergence of a novel beta-coronavirus in the past two decades,  
74 following its closest documented human pathogen severe acute respiratory syndrome  
75 coronavirus (SARS-CoV) in 2002, and the next closest, Middle East respiratory syndrome  
76 coronavirus (MERS-CoV) in 2012 (Cui et al., 2019; Gorbalenya and et al., 2020; Graham and  
77 Baric, 2010; Ksiazek et al., 2003; de Wit et al., 2016; Zaki et al., 2012). Both SARS and SARS-  
78 CoV-2 infect human cells by binding to the angiotensin convertase II receptor (ACE2) via the  
79 trimeric spike (S) class I fusion protein (Hoffmann et al., 2020; Wrapp et al., 2020a). The S protein  
80 comprises two subunits, S1 and S2. The S1 subunit contains a receptor binding domain (RBD),  
81 which binds to ACE2. To enter cells, S must undergo a protease cleavage event that allows S1  
82 to shed and expose the hydrophobic fusion peptide of the S2 subunit. SARS coronavirus  
83 predominantly enters cells via endosomes, assisted by cathepsin cleavage in the low pH (5.5-  
84 4.5) endosomal environment. SARS-CoV-2 acquired a new protease cleavage site that enables  
85 entry either at the cell surface after cleavage with TMPRSS2, or inside endosomes via protease  
86 cleavage similar to SARS, and the route of SARS-CoV-2 entry is likely dependent on the protease  
87 expression profile in target cells (Ou et al., 2020; Tang et al., 2020). ACE2 interactions appear to  
88 play a role in the pre-fusion shedding of S1 (Benton et al., 2020; Cai et al., 2020).

89 A detailed understanding of SARS-CoV-2 molecular vulnerabilities to antibody neutralization  
90 can accelerate progress in medical interventions such as antibody drug therapies and vaccines.  
91 Antibodies from several COVID-19 patients have revealed the presence of public antibody

92 responses that target SARS-CoV-2 via shared genetic elements and structural recognition modes  
93 in the IGHV3-53 and IGHV3-66 heavy chain V-genes. Members of this public antibody class target  
94 a conserved epitope on RBD on the S1 subunit that overlaps with the ACE2 binding site (Barnes  
95 et al., 2020; Brouwer et al., 2020; Cao et al., 2020; Chi et al., 2020; Du et al., 2020; Hansen et  
96 al., 2020; Hurlburt et al., 2020; Liu et al., 2020a; Rogers et al., 2020; Seydoux et al., 2020; Shi et  
97 al., 2020; Wu et al., 2020b; Yuan et al., 2020a). IGHV3-53/3-66 public class antibodies share  
98 common genetic features including IGHV-gene-encoded motifs NY in the CDR-H1, SGGS in the  
99 CDR-H2, a relatively short CDR-H3 length, and comparatively low levels of antibody somatic  
100 hypermutation (Barnes et al., 2020; Du et al., 2020; Wu et al., 2020a; Yuan et al., 2020a).  
101 Preliminary analysis of class light chain features show the inclusion of both kappa and lambda  
102 light chains in antibodies of this class (Catalan-Dibene, 2020; Du et al., 2020; Wang et al., 2020a;  
103 Wrapp et al., 2020b; Wu et al., 2020b, 2020b; Yuan et al., 2020a). Despite strong similarities in  
104 heavy chain gene signatures, IGHV3-53/3-66 anti-RBD antibodies show a broad range of  
105 neutralization potencies ( $IC_{50}$ 's from 0.003 to 2.547  $\mu$ g/mL), (Brouwer et al., 2020; Cao et al.,  
106 2020; Ju et al., 2020; Liu et al., 2020a; Robbiani et al., 2020; Rogers et al., 2020; Shi et al., 2020;  
107 Wu et al., 2020b; Yuan et al., 2020; Zost et al., 2020). Given the low somatic hypermutation  
108 observed and the importance of germline-encoded recognition motifs, it remains unclear what  
109 unique molecular features lead to the diverse range of SARS-CoV-2 neutralization potencies  
110 among IGHV3-53/3-66 class members.

111 SARS-CoV-2 S displays a pH-dependent conformational switch that causes the 'up' position  
112 of the RBD to rotate to a 'down' position (Walls et al., 2020; Zhou et al., 2020c). The RBD 'up'  
113 position is required for ACE2 engagement, as well as antibody binding for the IGHV3-53/3-66  
114 class (Du et al., 2020; Walls et al., 2020; Wrapp et al., 2020b). A mutational variant recently  
115 emerged that influences the RBD "up" vs. "down" state (D614G) that now constitutes >97% of  
116 isolates world-wide (Korber et al., 2020; Long et al., 2020; Volz et al., 2020; Yurkovetskiy et al.,  
117 2020; Zhang et al., 2020). The D614G mutation is proximal to the RBD in the spike structure, and

118 D614G appears to favor more RBD 'up' at both serological and endosomal pH (Grubaugh et al.,  
119 2020; Yurkovetskiy et al., 2020; Zhou et al., 2020c). The D614G substitution enhances viral  
120 infectivity, competitive fitness, and transmission, and may have important implications for  
121 antibody-based and vaccine interventions (Hou et al., 2020; Mansbach et al., 2020; Yurkovetskiy  
122 et al., 2020; Zhang et al., 2020); further investigations into the effects of D614G on IGHV3-53/3-  
123 66 class recognition and neutralization are required (Grubaugh et al., 2020).

124 Here we discovered a new member of the IGHV3-53/3-66 antibody class, mAb 910-30, with  
125 moderate neutralization capacity. To better understand the features of potent IGHV3-53/3-66  
126 class neutralization, we explored molecular and genetic features of 910-30 and other related  
127 antibodies, including heavy and light chain structural recognition motifs, biophysical correlates of  
128 neutralization, and the influence of D614 vs. D614G variants on IGHV3-53/3-66 class member  
129 interactions. Our study provides a detailed molecular understanding of how the public IGHV3-  
130 53/3-66 class leverages native heavy and light chain binding contributions against SARS-CoV-2,  
131 providing important data to accelerate medical interventions against SARS-CoV-2's vulnerable  
132 RBD epitope.

133

134 **Results**

135

136 **Isolation and structural characterization of a novel neutralizing class member**

137 We screened the immune repertoire of a COVID-19 convalescent patient, Donor 910 (To et  
138 al., 2020) treated at Hong Kong University, to identify a new member of the public IGHV3-53/3-  
139 66 antibody class. ELISA assays of Donor 910 serum showed potent S trimer recognition, and  
140 pseudovirus neutralization assays confirmed that Donor 910 serum showed high SARS-CoV-2  
141 neutralization titers (**Fig. S1**) (Wang et al., 2020b). Based on these data, Donor 910  
142 cryopreserved peripheral blood mononuclear cells (PBMCs) were selected for analysis using a  
143 recently described method to clone natively paired heavy and light chain antibody genes into  
144 yeast Fab display for functional screening (Wang et al., 2018). Yeast antibody display libraries  
145 were screened for binding against two different SARS-CoV-2 S protein probes, a His-labeled S-  
146 Trimer and a biotinylated S-Trimer, by fluorescence-activated cell sorting (FACS) (**Fig. S1**).  
147 Bioinformatic interrogation of yeast display NGS data revealed that one monoclonal antibody  
148 (mAb 910-30) enriched 90-fold in the round 2 sorted library against Biotin-22 S protein, and 2,296-  
149 fold in round 3 sorted libraries against His-labeled S protein. Based on these strong enrichment  
150 signals, mAb 910-30 was expressed as IgG in HEK293 cells for neutralization assays. 910-30  
151 showed a half-maximal inhibitory concentrations ( $IC_{50}$ ) against a VSV SARS-CoV-2 pseudovirus  
152 (Liu et al., 2020a) of 0.071  $\mu\text{g}/\text{mL}$ , and 0.142  $\mu\text{g}/\text{mL}$  against authentic SARS-CoV-2 (**Fig. 1A**)  
153 shown in comparison to the previously reported mAb CR3022 (Huo et al., 2020; Ter Meulen et  
154 al., 2006; Yuan et al., 2020b).

155 Next we characterized 910-30 structural recognition by cryo-electron microscopy (cryo-EM).  
156 Negative-staining electron microscopy revealed particles of 910-30 Fab bound to SARS-CoV-2  
157 S2P at pH 5.5 (**Fig. 1B**) (Zhou et al., 2020c), and also across a broader pH range of 4.0-7.4 (**Fig.**  
158 **S1**). Subsequent Cryo-EM mapping and molecular modeling of 910-30 Fab in complex with  
159 SARS-CoV-2 S2P protein at pH 5.5 showed 1 Fab bound to 1 RBD in the up position when mixing

160 Fab and spike in a 1:1 molar ratio (**Fig. 1C, Fig. S2, Supplemental Table 1**), whereas a 9:1  
161 Fab:spike molar ratio revealed mostly disordered spike (**Fig. 1D, Fig. S2, Supplemental Table**  
162 **1**), with an RBD that still fit the Cryo-EM map consistent with **Figure 1C**. Structural modeling of  
163 ACE2 (PDB entry 6M0J) and 910-30 (PDB entry 7KS9) in complex with SARS-CoV-2 RBD  
164 confirmed targeting of the ACE2 binding site (**Fig. 1E**). Analysis of soluble 910-30 IgG recognition  
165 of yeast-displayed aglycosylated N343Q RBD(333-537) confirmed that 910-30 recognizes a  
166 glycan-independent region (**Fig. S3A**) (Starr et al., 2020). Antibody titrations showed a 910-30  
167 IgG  $K_D$  to RBD of 230 pM (191 - 268 pM 95% confidence interval) (**Fig. S3B**), and that 910-30  
168 competes with human ACE2 (hACE2) for binding to RBD, consistent with IGHV3-53/3-66 class  
169 membership (**Fig. S3C**).

170

### 171 **Potent antibodies of the IGHV3-53/3-66 class compete strongly with ACE2 for binding to** 172 **spike**

173 Structural analysis of IGHV3-53/3-66 germline-encoded antibody recognition shows  
174 substantial overlap between the ACE2 binding site and the shared class epitope footprint (**Fig.**  
175 **2A**) (Barnes et al., 2020; Cao et al., 2020; Hansen et al., 2020; Ju et al., 2020; Liu et al., 2020a;  
176 Shi et al., 2020; Walls et al., 2020; Wu et al., 2020b). Despite low reported somatic hypermutation  
177 and shared epitope targets, reported IGHV3-53/3-66 antibody class members show a broad range  
178 of neutralization potencies (**Fig. 2B, Supplemental Table 2**). To better understand molecular  
179 features of potent antibody neutralization for this class, we assessed biophysical performance of  
180 a small panel of weak, moderate, and potent IGHV3-53/3-66 public antibody class members. We  
181 selected the antibodies 1-20 (a potent neutralizer), the new 910-30 (a moderate neutralizer), and  
182 B38 (a weak neutralizer), along with a VH-gene matched control (mAb 4-3) that neutralizes poorly  
183 and likely targets a different site on RBD (**Supplemental Table 3**) (Wu et al., 2020a; Zhou et al.,  
184 2020a). Preliminary IgG ELISA analysis revealed that class members show similar binding to  
185 RBD, whereas the more potent class members (1-20, 910-30) bound more tightly to full-length



186 spike (**Fig. 2C**). Pseudovirus & authentic virus neutralization show a range of two orders of  
187 magnitude in  $IC_{50}$  neutralization potencies for the selected panel (**Fig. 2D**), confirming that  
188 antibody neutralization within the class is driven by more complex parameters than simple  
189 recognition of the ACE2 binding site on RBD.

190 Next we assessed the ability of potent and weak neutralizers to compete with dimerized  
191 human ACE2 (dhACE2) for binding to spike (S2P). In a competition ELISA using antibody pre-  
192 mixed with serial dilutions of dhACE2, we found that more potently neutralizing class members  
193 competed more strongly with dhACE2 compared to less potent Abs (**Fig. 2E**). The most potent  
194 mAb (1-20) required 73 dhACE2 molecules for 50% binding inhibition of 1 IgG molecule. 1-20  
195 was 6-fold more competitive with dhACE2 than the moderate neutralizer 910-30 (dhACE2 molar  
196 excess  $IC_{50} = 12$ ), and 150-fold more competitive than the weak neutralizer B38 (dhACE2 molar  
197 excess  $IC_{50} = 0.48$ ). Sequence analysis revealed high similarity with low levels of somatic  
198 hypermutation, as previously reported for the IGHV3-53/3-66 antibody class (**Fig. 2F**) (Hurlburt et  
199 al., 2020; Yuan et al., 2020a). Given the broad variations in functional potency despite high  
200 sequence similarity, we next sought to understand the key contributions in heavy and light chain  
201 sequence signatures that lead to SARS-CoV-2 neutralization.

202

### 203 **Unique heavy and light chain interactions drive potent neutralization for the IGHV3-53/3-** 204 **66 neutralizing antibody class**

205 IGHV3-53/IGHV3-66 anti-SARS-CoV-2 antibodies show diverse light chain usage, with the  
206 two defining heavy chain genes (IGHV3-53 and IGHV3-66) pairing with at least 14 other light  
207 chain genes (**Supplemental Table 2**). To help understand the influence of light chain pairings,  
208 we constructed a panel of 12 non-native heavy:light swapped antibody variants from four IGHV3-  
209 53/3-66-encoded mAbs (1-20, 910-30, B38, and 4-3 included as an IGHV gene control). 11/12  
210 non-native antibodies expressed successfully and were assayed for SARS-CoV-2 pseudovirus  
211 neutralization. Heavy:light swap data revealed a substantial loss in neutralization for nearly all

212 non-native heavy:light combinations, with only the most potent antibody heavy chain (1-20)  
213 achieving significant neutralization with a non-native light chain (**Fig. 3A**). More potent  
214 neutralization of non-native heavy:light combinations was also correlated with strong dhACE2  
215 competition (**Fig. 3B**), consistent with the natively paired heavy:light dhACE2 competition ELISA  
216 data (**Fig. 2E**). As all four heavy chain genes have low somatic hypermutation & high sequence  
217 similarity, we had not anticipated widespread loss of performance when swapping light chains  
218 among class members (**Fig. 2F, Supplemental Table 3**). In contrast, **Figure 3A** shows that native  
219 light chains make substantial contributions to neutralization performance, and that non-native  
220 heavy and light chain pairings show reduced antibody performance, despite the high degree of  
221 sequence similarity among heavy chains.

222 To better understand the paired heavy and light chain determinants of antibody recognition,  
223 we performed a structure-based alignment to analyze residue interactions and identify possible  
224 light chain signatures of class membership (Lefranc et al., 2003; Zhu et al., 2013). We followed  
225 numerous anti-RBD IGHV3-53/3-66 antibody lineages paired with different light chain V genes  
226 including: KV1-33, KV1-9, KV1-39, KV3-20, and LV2-8 (Barnes et al., 2020; Hurlburt et al., 2020;  
227 Shi et al., 2020; Wu et al., 2020b; Yuan et al., 2020a). Structural analyses of antibody contact  
228 sites revealed that conserved residues in both VH and VL genes contributed 56-75% of binding  
229 surface area (BSA) (**Fig. 3C and Fig. S3D**). We confirmed alignments with previously defined  
230 signatures as a control (**Fig. S3D**). **Supplemental Figure 3D** shows the IGHV3-53/3-66 heavy  
231 chain projected surface with its germline encoded amino acids, including the interaction residues  
232 <sup>31</sup>SNY on CDR-H1 and <sup>52</sup>YSGxSxY, where x indicates any residue, on CDR-H2 that provide  
233 multiple hydrogen bonds interactions with Thr415, Gly416, Lys417, Asp420, Tyr421, Leu455,  
234 Tyr473, Ala475, and Asn487 in the RBD. We verified previous reports that these class sequences  
235 have shorter CDR-H3 lengths of 6-11 amino acids (**Fig. S3D**), and we also note that those CDR-  
236 H1 and CDR-H2 motifs are only present in IGHV3-53/3-66 genes. Sequence-structure alignments  
237 also revealed that kappa chain class members use a conserved [DGS]xSx{1,2}[FY] motif of 11 or

238 12 amino acids starting at residue 27a or 28 in the CDR-L1 to form hydrogen bonds with RBD  
239 residues Gln498 and Asn501 (**Fig. 3C**). In contrast, lambda chain binding in the class uses a  
240 different <sup>29</sup>GY[KN] motif with 14 amino acids in the CDR-L1 that interacts with RBD residues  
241 Gly502 and Tyr505 (**Fig. 3C**). Thus we defined here the <sup>27a/28</sup>[DGS]xSx{1,2}[FY] motif of 11 or 12  
242 amino acids in the CDR-L1 as a signature of kappa chain class members, and the <sup>29</sup>GY[KN] motif  
243 on 14 amino acids CDR-L1 as a signature of lambda class members. We did not observe a  
244 conserved binding motif in the CDR-L3 that contacts RBD, and we also note that the CDR-L1  
245 motifs defined here can be encoded by multiple light chain genes (**Fig. 3C, Table S4**).

246 Structural comparison of eight IGHV3-53/3-66 class members shows that Fab variable  
247 domains bind RBD with the same orientation, reflecting a conserved heavy chain recognition  
248 mode and defining the relevant conserved light chain residues for heavy:light pairing (**Fig. 3D**).  
249 Structural alignment also reveals a strongly conserved hydrogen bond network responsible for  
250 RBD recognition by CDR-H1. The backbone carbonyl group of Gly26<sub>HC</sub> interacts with the amide  
251 group of Asn487; the backbone CO group of Ser31<sub>HC</sub> contacts the hydroxyl group of Tyr473; the  
252 side chain amide group of Asn32<sub>HC</sub> contacts the carbonyl group of Ala475; and the hydroxyl group  
253 of Tyr33<sub>HC</sub> acts as hydrogen bond donor to Leu455 backbone CO group within CDR-H1. In the  
254 context of CDR-H2, the hydroxyl group of Ser53<sub>HC</sub> targets both the backbone CO group of R457  
255 and the hydroxyl group of Tyr421, the latter being involved in a hydrogen bond with the NH group  
256 of Gly54<sub>HC</sub> as well; and the hydroxyl group of Ser56<sub>HC</sub> interacts with the carboxyl group of Asp420.  
257 Overall, CDR-H2 interactions are less conserved among IGHV3-53/3-66 members compared to  
258 CDR-H1 interactions: the hydrogen bond between Tyr52<sub>HC</sub> hydroxyl group and Lys417 amine  
259 group is observed only in B38 and CV30, while the hydroxyl group of Thr415 and the NH group  
260 of Gly416 are targeted by the hydroxyl group of Tyr/Phe58<sub>HC</sub> only in B38, CV30 and 910-30.  
261 Structural comparison of light chain residues shows a strongly conserved tyrosine residue  
262 (Tyr32<sub>LC</sub>) in the CDR-L1 at the heavy:light chain interface which provides a stabilizing hydrophobic  
263 environment to the aromatic ring of Tyr505, together with Val28/29<sub>LC</sub> (in CV30, CC12.3, COVA2-

264 04), Ile29<sub>LC</sub> (in 910-30, B38, CB6, CC12.1) or Tyr30<sub>LC</sub> (in C105). In the case of CC12.1, B38 and  
265 910-30 Ser30<sub>LC</sub> interacts with the side chains of Gln498 and Asn501.

266 Using these defined sequence and structural motifs, we used published antibody repertoire  
267 data to estimate the prevalence of antibody class precursors in healthy human immune  
268 repertoires (Bräuninger et al., 2001; Sethna et al., 2019; Soto et al., 2019). Antibody lineages with  
269 anti-SARS-CoV-2 IGHV3-53/3-66 class characteristics were identified in approximately 1 in  
270 44,000 reported human antibody sequences (**Fig. 3E**) (Soto et al., 2019), which we found to be a  
271 high frequency in comparison to previously studied anti-HIV-1 VRC01-class antibody precursors  
272 that occur in approximately 1 in 1-4 million human antibodies (Zhou et al., 2013). These  
273 comparatively high frequency estimates of IGHV3-53/3-66 anti-RBD precursors in human  
274 immune responses support the recovery of antibodies from this class in multiple convalescent  
275 COVID-19 patients.

276

### 277 **RBD up/down conformation influences S protein recognition for the IGHV3-53/3-66** 278 **antibody class**

279 The RBD 'up' position is required for ACE2 engagement, as well as IGHV3-53/3-66 antibody  
280 binding (Du et al., 2020; Walls et al., 2020; Wrapp et al., 2020b). Cryo-EM structural analysis at  
281 endosomal pH has revealed a pH-mediated conformational switch that rotates RBD domains  
282 down at pH 5.5-4.5 (Zhou et al., 2020b). Because the recently emerged D614G mutation also  
283 alters the RBD 'up' vs. 'down' dynamics, we sought to understand how D614/D614G and pH-  
284 based alteration of 'up' vs. 'down' prevalence influence IGHV3-53/3-66 class recognition of spike  
285 (Walls et al., 2020; Zhou et al., 2020b). We investigated class binding at three pH values related  
286 to known RBD 'up' versus 'down' states for the D614 and D614G mutational variants (**Fig. 4A**)  
287 (Benton et al., 2020; Cai et al., 2020; Wrapp et al., 2020b; Yurkovetskiy et al., 2020; Zhou et al.,  
288 2020c). dhACE2 competition ELISA assays at pH 5.5 and 4.5 showed that IGHV3-53/3-66 class  
289 members compete in a concentration-dependent manner with dimeric human ACE2 for binding

290 to SARS-CoV-2 S2P spike, and to the D614G S2P spike (**Fig. 4B, Supplemental Fig. 3**). Using  
291 single-cycle surface plasmon resonance, we found that the extremely potent mAb 1-20  
292 recognized S protein and RBD with no loss in affinity at endosomal pH, whereas the less potent  
293 antibodies 910-30 and B38 showed reduced affinity in the endosomal pH range (**Fig. 4C,**  
294 **Supplemental Fig. 4**). We compared authentic virus neutralization  $IC_{50}$  potencies (from **Fig. 2D**)  
295 to the ratio of mAb-Spike affinity (**Supplemental Fig. 4**) divided by reported dhACE2-Spike affinity  
296 (Zhou et al., 2020b), which suggested that potent mAb neutralization was correlated with mAb  
297 affinity across all pH values tested (**Fig. 4D**). Finally, a qualitative Octet pH series analysis using  
298 D614 S2P spike showed that as the pH reduces (and RBDs preferentially rotate down), the potent  
299 neutralizer mAb 1-20 exhibited strong recognition of D614 S2P spike for  $pH \geq 6.0$ , whereas 910-  
300 30 showed reduced binding below  $pH=6.5$ , and the least potent B38 binding showed reduced  
301 binding below  $pH=7.0$  (**Fig. 2E**, left panel). In contrast, all class members maintained strong  
302 binding to mutant D614G S2P spike into the endosomal pH range (where one RBD likely remains  
303 up), and the potent antibody class member 1-20 recognized D614G spike down to pH 4.0 (**Fig.**  
304 **2E**, right panel). These data suggested that the most potent antibodies can maintain the bound  
305 state (and stabilize the RBD-up conformation) more effectively under endosomal pH conditions  
306 for D614 S2P spike, whereas all antibody class members could effectively recognize the native  
307 RBD-up conformation for D614G across a broad pH range. Our data support ACE2 competition  
308 as a functional signature of IGHV3-53/3-66 public antibody class neutralization, and we show that  
309 the RBD-up vs. RBD-down conformation substantially influenced the ability of IGHV3-53/3-66  
310 class antibodies to recognize spike trimer.

## 311 Discussion

312 Enhanced understanding of IGHV3-53/3-66 class-based spike recognition can provide  
313 insight into immune monitoring, antibody discovery, and vaccine design against SARS-CoV-2.  
314 Structural analysis of a novel class member mAb 910-30 revealed previously undescribed spike  
315 disassembly at high occupancy, and our antibody class comparative studies showed that native  
316 heavy:light pairing remains essential for potent neutralization, despite high similarities in heavy  
317 chain sequences. Comparative sequence-structure analyses enabled the identification of  
318 conserved light chain class signatures, defined as <sup>27a/28</sup>[GDS]xSx{1,2}[FY] (kappa) and <sup>29</sup>GY[KN]  
319 (lambda) residues in CDR-L1 that make key contributions to RBD recognition. We also note that  
320 class member light chains use common aromatic/hydrophobic residues <sup>28</sup>Val, <sup>29</sup>Ile/Val, or  
321 <sup>30/32</sup>Tyr30/32 to achieve similar interactions with <sup>505</sup>Tyr in the RBD, which is part of the shared  
322 ACE2 and IGHV3-53/3-66 class binding epitope. These shared light chain features illuminate the  
323 structural rationale for broader light chain diversity among IGHV3-53/3-66 class members.

324 The frequency of anti-SARS-CoV-2 IGHV3-53/3-66 precursor antibodies in healthy donors  
325 (around 1 in 44,000) was more common than the previously studied anti-HIV-1 VRC01-class  
326 antibody precursors observed in 1 per 1-4 million antibodies (Zhou et al., 2013). In addition, it has  
327 been shown that anti-HIV-1 VRC01-class antibodies also require much higher levels of somatic  
328 hypermutation (SHM) to achieve potent neutralization (Zhou et al., 2013). The comparably limited  
329 SHM required for anti-SARS-CoV-2 IGHV3-53/3-66 class antibodies appears to be a feature of  
330 IGHV germline gene neutralizing interactions and the need to recognize highly conserved viral  
331 variants, as compared to HIV-1 broadly neutralizing antibodies that must recognize broadly  
332 diverse viral variants and show limited germline gene neutralization. These findings help explain  
333 the observed reproducibility of public IGHV3-53/3-66 anti-RBD antibodies in convalescent  
334 COVID-19 patients.

335 D614G S2P spike variant shows a greater prevalence of RBD-up than D614G, which may  
336 enhance spike and the ACE2 host receptor recognition to confer higher D614G viral infectivity

337 (Hou et al., 2020; Mansbach et al., 2020; Yurkovetskiy et al., 2020; Zhang et al., 2020).  
338 Conversely, a sustained RBD 'up' also could make the virus more sensitive to neutralization, as  
339 the exposed 'up' RBD enhances exposure of vulnerable epitopes (Mansbach et al., 2020; Zhou  
340 et al., 2020c). We outlined differences in RBD display caused by the D614G mutation that  
341 enhance antibody class recognition of spike across a broad pH range, and we show that D614G  
342 had no detrimental impact on IGHV3-53/3-66 antibody class neutralization, which agrees with  
343 prior reports (Plante et al., 2020; Weisblum et al., 2020; Weissman et al., 2020). Interestingly,  
344 only the most potent antibodies could bind to the D614 variant at endosomal pH which  
345 demonstrated that high-affinity antibody recognition can prevent D614 RBD from rotating down at  
346 pH 5.5-4.5. These data imply that screening for antibody recognition of D614 S2P at endosomal  
347 pH could be an effective method to identify potent anti-SARS-CoV-2 antibodies, and other studies  
348 have reported potent antibodies that recognize S trimer even in the context of RBD down  
349 conformations (Tortorici et al., 2020). We also found that ACE2 competition at pH 7.4 was  
350 correlated with potent antibody protection, consistent with the known cell surface attachment to  
351 ACE2 at serological pH.

352 In summary, here we report the discovery of a new public IGHV3-53/3-66 antibody class  
353 member and outlined the unique heavy and light chain interactions that lead to potent immune  
354 recognition of both D614G and D614G spike variants. These data enhance our understanding of  
355 the public IGHV3-53/3-66 antibody class and highlight its convergent neutralization features to  
356 accelerate anti-SARS-CoV-2 antibody mapping and inform future efforts to identify and elicit  
357 neutralizing antibody responses against COVID-19.

358 **Acknowledgments:** We thank Jennifer Hackett from the Genome Sequencing Core Lab at the  
359 University of Kansas for help with Illumina sequencing, and R. Grassucci, Y.-C. Chi, and Z. Zhang  
360 from the Cryo-EM Center at Columbia University for assistance with cryo-EM data collection.  
361 Funding: This work was supported by the University of Kansas Departments of Pharmaceutical  
362 Chemistry and Chemical Engineering, COVID-19 Fast Grants, the Jack Ma Foundation, the  
363 American Lung Association, the Madison and Lila Self Graduate Fellowship Program, the Balsells  
364 Fellowship program, the Vaccine Research Center and the Division of Intramural Research of  
365 NIAID, NIH and by NIH grants DP5OD023118, R01AI141452, R21AI143407, and R21AI144408.  
366 This work was supported in part with federal funds from the Frederick National Laboratory for  
367 Cancer Research, NIH, under Contract HHSN261200800001.

368  
369 **Author Contributions:** B.B.B., G.C., A.S.F., C-H.S., S.N.L-A., K-T.Y, T.A.W., D.D.H., P.D.K.,  
370 L.S., and B.J.D., designed the experiments; B.B.B., G.C., A.S.F., C-H.S., M.O., P.K., Y.T., P.W.,  
371 M.S.N., Y.H., I.F., P.J.S., L.L., S.N.L-A., A.N., J.R.W., Y.L., X.P., B.M., A.D.L. and R.M. performed  
372 the experiments; A.S.O., I-T.T., J.Y., T.Z., E.R., and J.B. provided reagents for experiments,  
373 B.B.B., G.C., A.S.F., C-H.S., P.K., I.F., P.J.S., M.G-G., B.M., S.N.L-A., X.P, and B.J.D. analyzed  
374 the data; and B.B.B., G.C. A.S.F., C-H. S., P.D.K. L.S, and B.J.D. wrote the manuscript with  
375 feedback from all authors.

376  
377 **Competing Interest Declaration:** The authors declare no competing

378  
379 Correspondence and requests for materials should be addressed to B.J.D.

380



381 **Figure Legends**

382

383 **Fig. 1. A novel SARS-CoV-2 neutralizer in the reproducible IGHV3-53/3-66 antibody class**

384 **targets the ACE2 binding site of both ordered and disassembled spike. (A)** The novel SARS-

385 CoV-2 neutralizing antibody 910-30 shows moderately potent neutralization capacity compared

386 to the control mAb CR3022 in both VSV-pseudo-type virus and authentic virus assays. **(B)**

387 Negative-staining electron microscopy at pH 5.5 revealed 910-30 Fab bound to SARS-CoV-2 S2P

388 protein. A representative micrograph is shown. Inset shows representative 2D class averages;

389 arrows point to bound Fab fragments. Scale bars: 50 nm (micrographs) 20 nm (2D class

390 averages). **(C)** Cryo-EM map and molecular model of 910-30 Fab in complex with SARS-CoV-2

391 spike at 4.75 Å resolution. Only one conformation, with 1 Fab bound to 1 RBD up, is observed

392 when mixing Fab and spike in a 1:1 molar ratio at pH 5.5. NTD is colored in green, RBD in blue,

393 SD1 in magenta, SD2 in red, S2 in light blue, 910-30 antibody heavy chain in orange, 910-30 light

394 chain in yellow. **(D)** Cryo-EM map obtained when 910-30 Fab and spike are mixed in a 9:1 molar

395 ratio at pH 5.5. The only observed species is a mostly disordered spike in which RBD and 910-

396 30 Fab still fit the map consistently with the properly folded spike:910-30 complex shown in (C).

397 RBD is shown in blue, 910-30 heavy chain in orange, 910-30 light chain in yellow. **(E)** The

398 structural superposition of ACE2 (PDB entry 6M0J) and 910-30 (PDB entry 7KS9) in complex with

399 SARS-CoV-2 RBD shows a representative ACE2 competition mechanism defining IGHV3-53/3-

400 66 class neutralization. ACE2 is colored in green, 910-30 heavy chain in orange, 910-30 light

401 chain in yellow, RBD in blue.

402

403 **Fig. 2. IGHV3-53/3-66 class neutralization potency is driven by strong competition with**

404 **ACE2 for spike S2P recognition. (A)** Epitope footprint comparison between ACE2 binding site

405 and the IGHV3-53/3-66 class epitope on RBD show substantial overlap. Residues interacting with

406 ACE2 only are shown in green, residues targeted by the IGHV3-53/3-66 class only are shown in

407 orange, residues that overlap are shown in light blue. Other sites on RBD are represented in gray.  
408 **(B)** Dot-chart of reported wild-type authentic virus neutralization  $IC_{50}$  titers for previously published  
409 IGHV3-53/3-66 anti-RBD antibodies. Data were plotted without correcting for any differences in  
410 neutralization assay protocols. Line indicates the mean of  $IC_{50}$  values. A list of antibodies,  $IC_{50}$   
411 values, and citations are provided in Supplemental Table 2. **(C)** IgG ELISA binding titrations for  
412 select IGHV3-53/3-66 class members against S2P spike and RBD antigens, with an IGHV gene-  
413 matched control (mAb 4-3) and an isotype control. **(D)** Pseudovirus & authentic virus  
414 neutralization show that  $IC_{50}$  neutralization potency ranges two orders of magnitude between the  
415 selected IGHV3-53/3-66 class members, along with an IGHV gene-matched control (mAb 4-3).  
416 **(E)** dhACE2 competition ELISA against SARS-CoV-2 S2P spike showing constant IgG  
417 concentrations with increasing dhACE2 (ACE2) concentrations. dhACE2 concentration is  
418 provided as both  $\mu\text{g/mL}$  and as ACE2 molar excess units. **(F)** Sequence alignment of heavy chain  
419 (upper) and light chain (lower) genes selected for detailed investigation. 4-3 is an anti-RBD  
420 antibody encoded by IGHV3-66 that does not compete with ACE2, and serves as a heavy chain  
421 gene-matched control.

422

423 **Fig. 3. Heavy and light chain analyses reveal critical contributions of both VH and VL for**  
424 **potent antibody neutralization in the IGHV3-53/3-66 antibody class. (A)** Heavy and light chain  
425 swap neutralization panel produced from four mAbs (1-20, 910-30, B38, and 4-3 included as an  
426 IGHV gene control) assayed for SARS-CoV-2 pseudovirus neutralization. **(B)** dhACE2  
427 competition ELISA against SARS-CoV-2 S2P protein. Constant concentrations of heavy-light-  
428 swapped IgG were titrated with varying dhACE2 (ACE2) concentrations. dhACE2 concentration  
429 is provided in  $\mu\text{g/mL}$ , and also as ACE2 molar excess units. **(C)** Combined structure and  
430 sequences analyses reveal IGHV3-53/3-66 class light chain kappa (left panel) and lambda (right  
431 panel) genetic elements associated with the RBD contact interface. CDR-L1 residues are not  
432 specific to IGKV1-33 (910-30) and IGLV2-8 (C105) (Table S4). **(D)** Left panel: structural

433 superposition of IGHV3-53/3-66 Fab variable domains in complex with RBD shows the same  
434 binding orientation for 8 different class antibodies aligned on RBD. RBD is shown in blue, Fab  
435 heavy chain in solid color, Fab light chain in transparent color, according to antibody name and  
436 the PDB code (shown in parentheses). Right panel: close-up views of the Fab:RBD interface for  
437 the eight IGHV3-53/3-66 antibodies superimposed on RBD. Conserved interactions of CDR-H1,  
438 -H2 and -L1 define the structural signatures responsible for viral neutralization by the IGHV3-53/3-  
439 66 antibody class. **(E)** Estimated probability of IGHV3-53/3-66 class pre-cursor antibodies derived  
440 from healthy donor (HIP1, HIP2, HIP3) immune repertoires.

441  
442 **Fig. 4. Up/down conformational changes of RBD influence IGHV3-53/3-56 antibody class**  
443 **recognition of spike protein across the serological to endosomal pH range. (A)** Schematic  
444 of RBD conformational states inferred by Cryo-EM and experimental analysis for un-ligated D614  
445 and D614G spike. U and D denote 'up' and 'down' RBD configurations, respectively. Percentages  
446 denote observed particle populations. **(B)** dhACE2 competition ELISA at endosomal pH against  
447 SARS-CoV-2 S2P protein. Constant IgG concentrations were used with varying dhACE2 (ACE2)  
448 concentrations at pH 5.5 and 4.5. dhACE2 concentration is provided as both  $\mu\text{g/mL}$  and as ACE2  
449 molar excess units. **(C)** Single-cycle SPR kinetic assays for 1-20 and B38 IgG at serological and  
450 endosomal pH against biotinylated spike. Black traces represent experimental data and red traces  
451 represent the fit to a 1:1 interaction model. The number in parentheses represents the error of the  
452 fit in the last digit. **(D)** Correlations between authentic virus neutralization potency (from Fig. 2D)  
453 versus the ratio of antibody IgG affinity to spike S2P (from Fig. S4A) divided by dhACE2 affinity  
454 to spike S2P (reported from Zhou et al, 2020b). **(E)** Qualitative octet pH series for wild type S2P  
455 spike and escape mutant D614G S2P spike across a range of pH values. More potent IGHV3-  
456 53/3-66 class members retained binding at low pH against spike as compared to less potent class  
457 members.

458

459 **Supplementary Figure Titles and Legends**

460

461 **Fig. S1. Overview of 910-30 discovery from a convalescent COVID-19 patient utilizing**  
462 **natively paired antibody fragment yeast display, FACS bio-panning, and soluble**  
463 **characterization. (A)** Reduced SDS-PAGE gel shows SARS-CoV-2 His-Strep-II S-Trimer  
464 monomer protein at approximately 142 kDa. Schematics highlight unique features of SARS-CoV-  
465 2 Spike S2P antigen probes used for FACS biopanning of antibody yeast display libraries from a  
466 COVID-19 convalescent donor. **(B)** Hong Kong University convalescent Donor 910 serum showed  
467 strong binding to SARS-CoV-2 His-Strep-II S-Trimer protein compared to controls. **(C)** Workflow  
468 overview used to generate native VH:VL libraries from the COVID-19 convalescent donor  
469 HKU910 for functional antibody screening using yeast display. **(D)** Donor-derived antibody library  
470 bio-panning via FACS shows significant library enrichment after multiple rounds of sorting. *Left*  
471 Donor 910 pre-sort yeast library vs. sorted yeast library for His-S-Trimer antigen. *Right* Donor 910  
472 pre-sort yeast library vs. sorted yeast library for Biotin-S-Trimer antigen. **(E)** Negative-staining  
473 electron microscopy at pH 7.4 resolved complexes between SARS-CoV-2 S2P and 910-30 Fab.  
474 Left: representative micrograph; right: representative 2D class averages. White arrows point to  
475 Fab fragments in complexes formed between one Fab and one spike trimer; blue arrows point to  
476 Fab fragments in complexes formed between two Fab fragments and one spike trimer. **(F)**  
477 Negative-staining electron microscopy at pH 4.0, and 5.0 reveal no 910-30 Fab bound to SARS-  
478 CoV-2 S2P protein at given pH values. Representative micrographs are shown. Insets show  
479 representative 2D class averages. Scale bars: 50 nm (micrographs), 20 nm (2D class averages).

480

481 **Fig. S2. Cryo-EM analysis of 910-30 Fab in complex with SARS-CoV-2 spike at pH 5.5.**  
482 **Sample 1 obtained mixing 910-30 Fab and spike in a 1:1 molar ratio, sample 2 obtained**  
483 **mixing 910-30 Fab and spike in a 9:1 molar ratio. (A)** Representative micrograph and CTF of  
484 the micrograph for sample 1. **(B)** Representative micrograph and CTF of the micrograph for

485 sample 2. **(C)** Representative 2D classes for sample 1 (left) and sample 2 (right). **(D)** The  
486 orientations of all particles used in the final refinement are shown as a heatmap for sample 1 (left)  
487 and sample 2 (right). **(E)** The gold-standard Fourier shell correlation resulted in a resolution of  
488 4.75 Å for sample 1 (left) and 5.78 Å for sample 2 (right). **(F)** The local resolution of the two final  
489 maps are shown generated through cryoSPARC using an FSC cutoff of 0.5; left: sample 1, right:  
490 sample 2.

491

492 **Fig. S3. IGHV3-53/3-66 class member extended characterization and biophysical analysis.**

493 **(A)** Yeast-displayed aglycosylated RBD demonstrates 910-30 recognition is glycan-independent.  
494 S RBD N343Q with a C-terminal myc epitope tag was displayed on the surface of yeast and  
495 labeled with no protein or 1 nM of CR3022, human ACE2-Fc (hACE2), or 910-30. Cells were  
496 washed, secondarily labeled with anti-c-myc-FITC and Goat anti-Human IgG Fc PE conjugate,  
497 and read on a Sony SH800 cell sorter. Biological replicates were performed on two different days.  
498 **(B)** Yeast cell surface titrations of 910-30 IgG against aglycosylated S RBD yield a  $K_D$  of  $230 \pm$   
499  $38$  pM. Technical triplicates were performed for two biological replicates ( $n = 6$ ), and error reported  
500 is 2 s.e.m. **(C)** Yeast-displayed RBD competition binding experiments of free 910-30, hACE2 and  
501 CR3022 vs. biotinylated or unbiotinylated 910-30. Technical triplicates were performed for two  
502 biological replicates ( $n = 6$ ). **(D)** Heavy chain genetic elements associated with the IGHV3-53/3-  
503 66 antibody class. **(E)** Light chain CDR3 alignment of IGHV3-53/3-66 antibody class. **(F)** Lambda  
504 chain IGHV3-53/3-66 class member C105 shows moderate neutralizing capacity compared to  
505 potent kappa chain IGHV3-53/3-66 class member 1-20. **(G)** pH mediated dhACE2 competition  
506 measured by ELISA showing constant concentrations of heavy-light-swapped IgG binding to  
507 SARS-CoV-2 S2P protein versus increasing dhACE2 (ACE2) concentrations. Potently  
508 neutralizing heavy-light swap variants (Fig. 3A) show higher affinity binding to S2P spike and  
509 stronger ACE2 competition relative to less potent Abs. **(H)** 1-20, 910-30, and B38 show equivalent  
510 neutralization in a D614G authentic virus assay as for D614 authentic virus (Fig. 2D), with 4-3

511 included as a gene-matched control. **(I)** SARS-CoV-2 D614G S2P protein mutant variant pH  
512 mediated dhACE2 (ACE2) competition measured by ELISA showing constant concentrations of  
513 heavy-light-swapped IgG versus increasing dhACE2 concentrations. Potently neutralizing heavy-  
514 light swap variants show higher affinity binding to D614G S2P mutant spike and stronger ACE2  
515 competition relative to less potent Abs. The concentration of dhACE2 required to outcompete  
516 antibody binding to spike is given as both  $\mu\text{g/mL}$  and as ACE2 molar excess units. **(J)** D614G  
517 authentic virus neutralization potency (Fig. S4H) and dhACE2 competition  $\text{IC}_{50}$  (Fig. S4I) show a  
518 correlation between potent neutralization and stronger ACE2 competition.

519

520 **Fig. S4. Extended binding and neutralization analysis across multiple pH values. (A)** pH  
521 mediated SPR single-cycle kinetic experiments for 910-30, B38, 4-3, and 1-20, for IgG binding to  
522 biotinylated spike (top row) and to biotinylated-RBD (bottom row) in each of the four panels. Black  
523 traces represent the experimental data and red traces represent the fit to a 1:1 interaction model.  
524 The number in brackets represents the error of the fit in the last significant digit. **(B)** Correlations  
525 between both authentic and pseudovirus neutralization vs. the ratio of antibody IgG affinity to RBD  
526 or Spike divided by dimeric ACE2 affinity to RBD or Spike.

527 **Supplemental Table Legends**

528

529 **Table S1.** Cryo-EM data collection and refinement statistics for 910-30 Fab in complex with  
530 SARS-CoV-2 spike at pH 5.5.

531

532 **Table S2.** List of IGHV3-53 / IGHV3-66 anti-SARS-CoV-2 antibodies in previously published  
533 articles.

534

535 **Table S3.** Features of the IGHV3-53/3-66 antibodies investigated in this study.

536

537 **Table S4.** Heavy chain and light chain CDR1 and CDR 2 sequence alignment for recognition  
538 signature related to Figures 3C, S3D, and S3E.

539

540 **STAR Methods**

541

542 **RESOURCE AVAILABILITY**

543

544 **Lead Contact**

545 Further information and requests for resources and reagents should be directed to and will be

546 fulfilled by the Lead Contact, Brandon J. DeKosky ([dekosky@ku.edu](mailto:dekosky@ku.edu)).

547

548 **Materials Availability**

549 Plasmids for antibody 910-30 generated in this study are available upon request for non-  
550 commercial research purposes.

551

552 **Data and Code Availability**

553 Cryo-EM coordinates and maps are deposited in the Protein Data Bank with accession code 7KS9  
554 and in the Electron Microscopy Data Bank with accession code EMD-23016 (trimeric spike) and  
555 EMD-23039 (disrupted spike). The 910-30 neutralizing antibody variable heavy and variable light  
556 chain sequences have been deposited in GenBank with accession numbers MY291105 and  
557 MY291106, respectively. This study did not generate any unique datasets or code.

558

559 **EXPERIMENTAL MODEL AND SUBJECT DETAILS**

560 Patient samples in the form of peripheral blood mononuclear cells (PBMCs) for B cell sorting were  
561 obtained from a convalescent SARS-CoV-2 patient, Donor 910. Cell line Expi293F cell was  
562 purchased from Thermo Fisher Scientific. Cell line HEK293T cell was purchased from Sino  
563 Biological. Cell line Vero C1008 (Vero-E6 cell) was purchased from ATCC. The cells were  
564 maintained and used following manufacturer suggestions and as described in detail below.



565 **METHOD DETAILS**

566

567 **Human Sample Collection**

568 Informed consent was obtained for all study participants under IRB-AAAS9010 (Hong Kong  
569 University). Donor 910 (To et al., 2020) serum was collected for ELISA and neutralization assays,  
570 and PBMCs were cryopreserved for subsequent B cell receptor gene capture and antibody  
571 screening.

572

573 **Expression and Purification of SARS-CoV-2 Antigens**

574 The antigen probes used for sorting yeast surface displayed libraries were prepared as  
575 previously described (Liu et al., 2020a). Briefly, expression vectors encoding the ectodomain of  
576 the SARS-CoV-2 S protein was transiently transfected into Expi293 cells and then purified five  
577 days post transfection using on-column purification methods.

578

579 **Production of SARS-CoV-2 Pseudovirus**

580 SARS-CoV-2 pseudovirus was generated using recombinant Indiana vesicular stomatitis  
581 virus (rVSV) as previously described (Han et al., 2020; Liu et al., 2020a; Nie et al., 2020; Whitt,  
582 2010). HEK293T cells were grown to 80% confluency then used for transfection of pCMV3-SARS-  
583 CoV-2-spike (kindly provided by Dr. Peihui Wang, Shandong University, China) using FuGENE 6  
584 (Promega). Cells were cultured to grow overnight at 37 °C with 5% CO<sub>2</sub>. Then medium was  
585 removed and VSV-G pseudotyped ΔG-luciferase (G\*ΔG-luciferase, Kerafast) was harvested to  
586 infect the cells in DMEM at a MOI of 3 for 1 h. Then cells were washed three times with 1× DPBS.  
587 DMEM supplemented with anti-VSV-G antibody (I1, mouse hybridoma supernatant from CRL-  
588 2700; ATCC) and was added to the inoculated cells. The cells were then cultured overnight. The  
589 supernatant was removed the following day and clarified by centrifugation at 300 g for 10 mins  
590 before storing at -80 °C.

591

## 592 **Emulsion Overlap Extension RT-PCR and Yeast Display Library Generation**

593 B cells were isolated from Donor 910 cryopreserved PBMCs. Non-B cells were depleted by  
594 magnetic bead separation, and CD27<sup>+</sup> antigen-experienced B cells were isolated by positive  
595 magnetic bead separation (EasySep Human B cell enrichment kit w/o CD43 depletion,  
596 STEMCELL Technologies, Vancouver, Canada, and CD27 Human Microbeads, Miltenyi Biotec,  
597 Auburn, CA, USA). Antigen-experienced B cells (memory B cells) were stimulated *in vitro* for 5  
598 days to enhance antibody gene transcription. For stimulation, cells were incubated 5 days in the  
599 presence of Iscove's Modified Dulbecco's Medium (IMDM) (Thermo Fisher Scientific)  
600 supplemented with 10% FBS, 1x GlutaMAX, 1x non-essential amino acids, 1x sodium pyruvate  
601 and 1x penicillin/streptomycin (Life Technologies) along with 100 units/mL IL-2 and 50 ng/mL IL-  
602 21 (PeproTech, Rocky Hill, NJ, USA). B cells were co-cultured with irradiated 3T3-CD40L  
603 fibroblast cells that secrete CD40L (kind gift of John Mascola, Vaccine Research Center, NIAID)  
604 to aid B cell expansion. Single B cells were captured in emulsion droplets via a flow focusing  
605 device with concentric nozzles flowing suspended cells, lysis buffer with mRNA capture magnetic  
606 oligo (dT)-coated magnetic beads, and a viscous oil solution to form stable droplets  
607 compartmentalizing single B cells with lysis buffer and the mRNA capture beads (McDaniel et al.,  
608 2016). Captured beads loaded with single-cell mRNA were re-emulsified and the captured RNA  
609 product was reverse transcribed using a SuperScript™ III One-Step RT-PCR System with  
610 Platinum™ Taq DNA Polymerase (Thermo Fisher Scientific). The specific immunoglobulin VH  
611 and VL genes were then processed with an overlap-extension RT-PCR to link native heavy and  
612 light chains into a single amplicon, introducing two restriction sites: NheI and NcoI between the  
613 VH and VL genes for downstream yeast library generation (Wang et al., 2018). Natively paired  
614 antibody heavy and light chain sequencing and yeast surface display library generation were  
615 performed as described previously (DeKosky et al., 2013, 2015; Lagerman et al., 2019; McDaniel  
616 et al., 2016; Wang et al., 2018).

617

618 For yeast library generation, cDNA libraries were amplified with primers containing the yeast  
619 display vector restriction sites: *Ascl* and *NotI*, used for subcloning into the yeast display vector.  
620 PCR amplified products were purified by agarose gel extraction and digested with *Ascl* and *NotI*  
621 restriction enzymes followed by subsequent ligation into the yeast display vector backbone. This  
622 step was performed in duplicate for each library with separate Kappa- or Lambda- gene-specific  
623 primers and a corresponding Kappa or Lambda display vector to generate Kappa and Lambda  
624 libraries. Ligated plasmid libraries were transformed into high-efficiency electrocompetent *E. coli*,  
625 expanded overnight, and maxiprepmed to isolate the plasmid library DNA product. Maxiprepmed  
626 plasmid libraries were digested with *NheI* and *NcoI* restriction enzymes to remove the native linker  
627 from VH:VL pairing. Digested product was purified by agarose gel extraction, and then ligated  
628 with a pre-digested DNA gene encoding a bidirectional Gal1/Gal10 promoter inserted between  
629 the VH and VL sequences. The resulting ligated product was again transformed into high-  
630 efficiency electrocompetent *E. coli*, expanded overnight, and maxiprepmed to isolate the plasmid  
631 library DNA product now containing the bidirectional promoter. A final PCR amplification was  
632 performed to amplify the VH:bidirectional promoter:VL amplicon with overhanging homologous  
633 ends to the pCT backbone for high-efficiency yeast transformation into AWY101 using an  
634 homologous recombination method previously described (Benatuil et al., 2010). Transformed  
635 libraries were passaged twice in SD-CAA to ensure a 1:1 ratio of plasmid DNA to yeast colony  
636 (Benatuil et al., 2010).

637

### 638 **FACS Screening of Yeast Libraries**

639 To induce Fab surface expression yeast libraries were incubated in SGD-CAA media at  
640 20°C, 225 rpm for 36 hours. For the first round of sorting,  $3 \times 10^7$  presorted cells were washed twice  
641 with staining buffer (1x PBS with 0.5% BSA and 2 mM EDTA). Washed yeast display libraries  
642 were stained with 20nM of trimer antigen and a monoclonal anti-FLAG-FITC marker to measure

643 Fab expression (Monoclonal ANTI-FLAG M2-FITC antibody, Sigma-Aldrich, St. Louis, MO, USA).  
644 For staining with the NHS-Biotin S-Trimer Protein probe, cells were mixed with 20nM un-labeled  
645 antigen and a monoclonal anti-FLAG-FITC marker (Monoclonal ANTI-FLAG M2-FITC antibody,  
646 Sigma-Aldrich, St. Louis, MO, USA) used to measure VL surface expression. This mix was  
647 incubated for 15 minutes at 4°C with gentle agitation on a platform shaker. Following incubation,  
648 a Streptavidin PE conjugate (Streptavidin, R-Phycoerythrin Conjugate Premium Grade, Thermo  
649 Fisher Scientific, Waltham, MA, USA) was added to the re-suspended mix to fluorescently label  
650 the biotinylated antigen protein and the sample was again incubated for 15 minutes at 4°C with  
651 gentle agitation on a platform shaker. These NHS-Biotin S-Trimer Protein samples were then  
652 washed 3x and re-suspended in a final volume of 1 mL in staining buffer before being filtered  
653 through a 35 micron-filter cap FACS tube. For staining the with His-Strep-II S-Trimer Protein  
654 probe, cells were incubated with un-labeled antigen for 15 minutes at 4°C with gentle agitation on  
655 a platform shaker. Samples were then washed 3x with staining buffer, and resuspended in a  
656 common mix containing the monoclonal anti-FLAG-FITC marker and a monoclonal anti-His-PE  
657 antibody (PE anti-His Tag Antibody, BioLegend, San Diego, CA, USA) to label surface expressed,  
658 antigen bound Fab. These cells were again incubated for 15 minutes in the fluorophore mix at  
659 4°C with gentle agitation on a platform shaker. The fluorescently labeled samples were then  
660 washed 3x and resuspended in a final volume of 1 mL staining buffer before being filtered through  
661 a 35 micron-filter cap FACS tube. Samples were kept in the dark on ice until sorting. Subsequent  
662 rounds of enrichment sorting were performed using the same staining procedure, but for only  
663  $5 \times 10^6$  input cells and 250 uL final resuspension volume.

664 A SONY Multi-Application 900 cell sorter running SONY LE-MA900FP Cell Sorter Software  
665 was used to detect all FITC+/PE+ cells from each sample and sort them into low pH SD-CAA  
666 media. The gating strategy used was previously described (Wang et al., 2018). Sorted yeast were  
667 expanded for 24-48 hours at 30 °C, 225 rpm and then passaged into SGD-CAA media to induce  
668 Fab expression for the next round of sorting. This process was repeated for 3-4 rounds of sorting

669 to enrich for Fab-expressing antigen-binding library populations. In addition to the antigen-positive  
670 sorts, an aliquot of each yeast library was washed and stained with only the anti-FLAG-FITC  
671 marker, and all FITC+ (i.e., VL+) cells were sorted and sequenced for use as a reference database  
672 for NGS enrichment ratio calculations. Analysis of flow cytometry data was conducted using  
673 Flowjo10.4 (Flowjo, LLC, Oregon, USA).

674

### 675 **NGS Analysis of Sorted Yeast Libraries**

676 After each round of FACS enrichment, yeast libraries were expanded via incubation at 30°C  
677 for 24-48 hours. An aliquot of this culture was used for high-efficiency yeast plasmid DNA  
678 extraction (Whitehead et al., 2012). A high-fidelity polymerase (Kapa Hifi HotStart Mastermix,  
679 Kapa Biosystems, Massachusetts, USA) and primers targeting the yeast display vector backbone  
680 were used to amplify HC and LC genes from each library (Wang et al., 2018). A second round of  
681 primer-extension PCR with barcoded primers added a unique identifier to all HC and LC from a  
682 particular library (McDaniel et al., 2016). Sorted libraries were sequenced on the Illumina 2x300  
683 MiSeq platform and sequencing was performed for each library after each round of FACS  
684 enrichment. Data processing of Illumina Raw FASTQ data was performed as reported previously  
685 (McDaniel et al., 2016; Wang et al., 2018). Briefly, Illumina sequences were quality-filtered to  
686 improve read quality, followed by V(D)J gene identification and annotation of CDR3 regions using  
687 IgBLAST (Ye et al., 2013). Antibody clonal lineages were tracked across yeast sort rounds by  
688 their CDR-H3 amino acid sequence and enrichment ratio. Enrichment ratios were calculated by  
689 comparing sequence prevalence in each sorted libraries to the unsorted, Fab-expressing (VL+)  
690 antibody library.

691

### 692 **Antibody Production and Purification**

693 The 910-30 antibody was codon-optimized, cloned into mammalian expression plasmid, and  
694 expressed as full human antibody IgG1s by co-transfection into Expi293 cells. Heavy and light

695 chain plasmids were co-transfected into Expi293F (ThermoFisher) mammalian cells using the  
696 ExpiFectamine™ 293 Transfection Kit (Thermo Fisher Scientific, Massachusetts, USA) and  
697 culture in 37°C shaker at 125 RPM and 8% CO<sub>2</sub>. On day 6 post transfection, the supernatant  
698 from transient transfection culture were purified with Protein G or A resin (GenScript, New Jersey,  
699 USA) and concentrated using an Amicon Ultra-4 Centrifugal 30K Filter Unit (MilliporeSigma,  
700 Maryland, USA), then stored at 4°C.

701

### 702 **ELISA Binding Assays to S trimer and RBD**

703 S trimer and RBD enzyme-linked immunosorbent assays (ELISAs) (Fig. 2C) were performed  
704 in triplicate. 175 ng of antigen per well was coated onto 96-well ELISA plates at 4 °C overnight.  
705 Plates were washed and then blocked with 100 µL of blocking buffer at 37 °C for 2 hrs. Purified  
706 antibodies were serial diluted using dilution buffer, added to the antigen-coated blocked plates,  
707 and then incubated at 4 °C for 1 hr. Plates were washed and 50uL of a secondary anti-human  
708 kappa light chain detection antibody (A18853, Invitrogen, Carlsbad, CA) was added to each well  
709 and incubated at room temperature for 1 hr. After the final wash, 50 uL TMB substrate (00-4203-  
710 56, ThermoFisher Scientific, Waltham, MA) was used to detect antibody binding to antigen  
711 measuring absorbance at 405 nm.

712

### 713 **Pseudovirus SARS-CoV-2 Viral Neutralization Assay**

714 SARS-CoV-2 pseudovirus neutralization assays were performed as previously described  
715 (Liu et al., 2020a). Briefly, pseudovirus particles were generated from recombinant Indiana VSV  
716 (rVSV) expressing SARS-CoV-2 S protein. Neutralization was assessed by incubating  
717 pseudoviruses with serial dilutions of purified antibody, and scored by the reduction in luciferase  
718 gene expression.

719

### 720 **Authentic SARS-CoV-2 Viral Neutralization Assay**

721 Authentic virus neutralization assays were performed as previously described (Liu et al.,  
722 2020a). Briefly, to measure the neutralizing activity of purified mAbs an end-point dilution assay  
723 in a 96-well plate format was performed. Each mAb was 5-fold serially diluted starting at 20 µg/mL  
724 in triplicate. Dilutions were incubated with live SARS-CoV-2 for 1 hr at 37°C, and post-incubation  
725 the virus-antibody mixture was transferred onto a monolayer of Vero-E6 cells and incubated for  
726 70 hrs. CPE from the resulting cell incubations were visually scored for each well in a blinded  
727 fashion by two independent observers.

728

### 729 **dhACE2 Competition ELISA**

730 Antibodies were assayed for dhACE2 competition by enzyme-linked immunosorbent assays  
731 (ELISAs) (Fig. 2E, 3C, S3I) in triplicate. ELISA experiments were performed in parallel at three  
732 pH values 7.4, 5.5, and 4.5. ELISA 96-well plates were coated with 175 ng per well of antigen in  
733 pH-adjusted PBS and incubated at room temperature for 1 hr. Ag-coated ELISA plates were  
734 washed and blocked with 100 µL of blocking buffer and incubated at room temperature for 1 hr.  
735 Purified antibodies were serially diluted and pre-mixed with dhACE2 using pH-adjusted dilution  
736 buffer. Ab:dhACE2 premixes were added to the pre-blocked, antigen-coated plates and incubated  
737 at room temperature for 2 hr. Plates were washed and 50 µL of 1:2000 diluted, pH-adjusted  
738 secondary anti-human kappa light chain detection antibody (A18853, Invitrogen, Carlsbad, CA)  
739 solution was added to each well and incubated at room temperature for 1 hr. After the final wash,  
740 50 µL Super AquaBlue substrate was used to detect antibody binding to antigen measuring  
741 absorbance at 405 nm.

742

### 743 **RBD Glycan Recognition Analysis via Yeast Display**

744 For plasmid construction, pJS699 (S-RBD (333-537)-N343Q for fusion to the C-terminus of  
745 AGA2) was synthesized by PCR amplifying pUC19-S-ecto with primers PJS-P2196/PJS-P2197  
746 (2.9kb) and PJS-P2198/PJS-P2199 (0.65kb). The resulting products were fractionated by

747 agarose gel electrophoresis and the bands corresponding to the desired products were excised  
748 from the gel and purified using a Monarch DNA Gel Extraction Kit (NEB). The fragments were  
749 assembled using NEBuilder HiFi DNA assembly master mix (NEB) according to the  
750 manufacturer's instructions and 5  $\mu$ l of the reaction was transformed into chemically competent  
751 *E. coli* Mach1 (Invitrogen) and selected on LB agar supplemented with 50  $\mu$ g/ml kanamycin.

752 To create the display construct of S-RBD (333-537)-N343Q fused to the C-terminus of  
753 Aga2p, pJS697 was digested with BsaI-HFv2 (NEB) and purified using a Monarch PCR & DNA  
754 Cleanup Kit (NEB). pJS699 was digested with NotI-HF (NEB), the reaction fractionated by  
755 agarose gel electrophoresis, and the band corresponding to S-RBD (0.83kb) excised and purified  
756 using a Monarch DNA Gel Extraction Kit (NEB). The two fragments were co-transformed (in a  
757 2.4:1 molar ratio of S-RBD to backbone) into chemically competent *S. cerevisiae* EBY100 (Boder  
758 and Wittrup, 1997) and selected on M19D agar. M19D contained 5 g/L casamino acids, 40 g/L  
759 dextrose, 80 mM 2-(*N*-morpholino) ethanesulfonic acid (MES free acid), 50 mM citric acid, 50 mM  
760 phosphoric acid, 6.7 g/L Yeast Nitrogen Base (Sigma), and was adjusted to pH 7 with 9M NaOH,  
761 1M KOH.

762 Recombinant human ACE2-Fc and CR3022 were received as a gift from Neil King and  
763 David Veessler at the University of Washington. Human ACE2-Fc was produced and purified as  
764 described (Walls et al., 2020). CR3022 (Ter Meulen et al., 2006) was expressed by transient  
765 transfection in Expi293F cells and purified by protein A affinity chromatography and SEC using a  
766 Superdex 200 10/300 GL. Specificity was verified by measuring binding to SARS-CoV-2 RBD and  
767 irrelevant antigen.

768 For yeast display screening, EBY100 harboring the RBD display plasmid was grown in 1  
769 mL M19D overnight at 30°C. Expression was induced by resuspending the M19D culture to  
770 OD<sub>600</sub>=1 in M19G (5 g/L casamino acids, 40 g/L galactose, 80 mM MES free acid, 50 mM citric  
771 acid, 50 mM phosphoric acid, 6.7 g/L yeast nitrogen base, adjusted to pH7 with 9M NaOH, 1M  
772 KOH) and growing 22 h at 22 °C with shaking at 300 rpm. Yeast surface display titrations were



773 performed as described (Chao et al., 2006) with an incubation time for 910-30 of 4 h and using  
774 secondary labels anti-c-myc-FITC (Miltenyi Biotec) and Goat anti-Human IgG Fc PE conjugate  
775 (Invitrogen Cat. No. 12-4998-82). Titrations were performed in biological replicate.

776

### 777 **Glycosylation-Independent Binding for Antibody 910-30**

778 EBY100 harboring the RBD display plasmid was grown in 1 ml M19D overnight at 30°C.  
779 Expression was induced by resuspending the M19D culture to OD<sub>600</sub>=1 in M19G (5 g/L casamino  
780 acids, 40 g/L galactose, 80 mM MES free acid, 50 mM citric acid, 50 mM phosphoric acid, 6.7 g/L  
781 yeast nitrogen base, adjusted to pH7 with 9M NaOH, 1M KOH) and growing 22 h at 22 °C with  
782 shaking at 300 rpm. Yeast surface display titrations were performed as described (Chao et al.,  
783 2006) with an incubation time for 910-30 of 4 h at room temperature and the secondary labels  
784 anti-c-myc-FITC (Miltenyi Biotec) and Goat anti-Human IgG Fc PE conjugate (Invitrogen Catalog  
785 # 12-4998-82). Titrations were performed in biological replicate (n = 2) with three technical  
786 replicates.

787 910-30 IgG was chemically biotinylated using NHS-Ester biotin (ThermoFisher EZ-Link  
788 Biotin Cat. No. 20217) at a 20:1 molar ratio of biotin:IgG according to manufacturer's instructions.  
789 1x10<sup>5</sup> yeast cells were labelled with no protein or 100 nM non-biotinylated CR3022, hACE2 or  
790 910-30 for 30 min at room temperature in PBSF (PBS containing 1 g/L BSA). The same cells  
791 were then labelled with 1 nM chemically biotinylated 910-30, in the same tube without washing,  
792 for 30min at room temperature in PBSF. The cells were centrifuged and washed with 200 µL  
793 PBSF. They were labeled with 0.6 µL FITC, 0.25 µL SAPE and 49.15 µL PBSF for 10 min at 4°C.  
794 Cells were then centrifuged, washed with PBSF, and analyzed on a flow cytometer. Experiments  
795 were performed with three technical replicates and two biological replicates.

796

### 797 **Delineation of IGHV3-53/3-66 Sequence Signatures**

798 A structure-based method was applied to define sequence signatures for the HV3-53/3-66  
799 class COVID neutralizing antibody (Zhu et al., 2013). Briefly, protein structures of IGHV3-53/3-66  
800 antibodies complexed with RBD or spike were selected for analysis, and the buried surface area  
801 (BSA) between antibody and RBD was calculated by the PDBePISA server  
802 (<https://www.ebi.ac.uk/pdbe/pisa/>). We examined the BSA larger than 20 Å<sup>2</sup>, and residues making  
803 contacting with the RBD projected surface that were encoded by the conserved germline  
804 sequence were selected as initial class sequence signatures, and amino acids from somatic  
805 hypermutations were used to refine the signature of the class antibody. For germline sequence  
806 alignments, heavy and light chain germline sequences were downloaded from IMGT (Lefranc et  
807 al., 2003) and the sequences of CDR1 and CDR2 were extracted and aligned based on Kabat  
808 numbering. ANARCI server was used to number amino acid sequences of antibody  
809 (<http://opig.stats.ox.ac.uk/webapps/newsabdab/sabpred/anarci>).

810

### 811 **Antibody Class Frequency Estimation**

812 The frequency of antibody class was estimated using OLGA software based on defined  
813 motif (Sethna et al., 2019). NGS samples of three healthy donors (NCBI Short Read Archive  
814 accession code: PRJNA511481) were used to analyze heavy and light chain lineage precursor  
815 frequencies (Soto et al., 2019). The ratio of human kappa and light chain (60:40) was obtained  
816 from Bräuning et al., 2001. Antibody class precursor frequency was calculated as:

$$\begin{aligned} 817 & \quad (Frequency\ of\ heavy\ chain \times Frequency\ of\ kappa\ chain \times kappa\ chain\ ratio) + \\ 818 & \quad (Frequency\ of\ heavy\ chain \times Frequency\ of\ lambda\ chain \times lambda\ chain\ ratio) \end{aligned}$$

819

### 820 **Negative Stain Cryo-EM**

821 Samples were diluted to a spike concentration of about 20 µg/ml. A 4.7-µl drop of the diluted  
822 sample was applied to a glow-discharged carbon-coated copper grid. The grid was washed with  
823 a buffer with the same pH as the sample buffer (10 mM HEPES with 150 mM NaCl for pH 7.4; 10

824 mM acetate with 150 mM NaCl for the lower pH values). Protein molecules adsorbed to the carbon  
825 were negatively stained with 0.75% uranyl formate. Datasets were collected using a  
826 ThermoFisher Talos F200C electron microscope equipped with a Ceta CCD camera. The  
827 microscope was operated at 200 kV, the pixel size was 2.53 Å (nominal magnification: 57,000),  
828 and the defocus was set at -1.2 µm. Particles were picked and extracted automatically using in-  
829 house written software (YT, unpublished). 2D classification was performed using Relion 1.4  
830 (Scheres, 2012).

831

### 832 **Cryo-EM Sample Preparation**

833 SARS-CoV-2 S2P spike was expressed and purified as described in Wrapp et al., 2020.  
834 910-30 Fab was prepared by incubating the full 910-30 IgG with immobilized papain for 3 hours  
835 at 37 °C in 50 mM phosphate buffer, 120 mM NaCl, 30 mM cysteine, 1 mM EDTA, pH 7. Purified  
836 SARS-CoV-2 spike was diluted to a final trimer concentration of 0.33 mg/mL and mixed with 910-  
837 30 Fab in a 1:1 molar ratio (sample 1) or 1:9 molar ratio (sample 2). The final buffer for both  
838 samples was 10 mM sodium acetate, 150 mM NaCl, pH 5.5; 0.005% w/v n-Dodecyl β-D-maltoside  
839 (DDM) was added to the mixture to prevent aggregation during vitrification. After incubation for 1  
840 hour on ice, a volume of 2 µL was applied to a glow-discharged carbon-coated copper grid (CF  
841 1.2/1.3 300 mesh) and vitrified using a Vitrobot Mark IV with a wait time of 30 seconds and a blot  
842 time of 3 seconds.

843

### 844 **Cryo-EM Data Collection, Processing and Model Fitting**

845 Cryo-EM data were collected using the Legikon software (Suloway et al., 2005) installed on  
846 a Titan Krios electron microscope operating at 300 kV, equipped with a Gatan K3-BioQuantum  
847 direct detection device. The total dose was fractionated for 3 s over 60 raw frames. Data  
848 processing including motion correction, CTF estimation, particle picking and extraction, 2D  
849 classification, ab initio model generation, 3D refinements and local resolution estimation for both

850 sample 1 and sample 2 datasets were carried out in cryoSPARC 2.15 (Punjani et al., 2017). The  
851 coordinates of SARS CoV-2 spike with 1 RBD up, PDB entry 6VYB (Walls et al., 2020), were  
852 employed as initial template to model the cryo-EM map of 910-30 Fab in complex with SARS-  
853 CoV-2 spike (sample 1). The RBDs were modeled using the crystallographic structure of RBD in  
854 complex with B38 Fab (PDB entry 7BZ5) (Wu et al., 2020b) as a template. The variable region of  
855 910-30 Fab was initially modeled using PDB models 7BZ5 and 5SX4 (Sickmier et al., 2016) for  
856 the heavy and light chain respectively. The residues at the Fab:RBD interface were modeled by  
857 structural comparison of 910-30 Fab with 7 different antibodies belonging to the IGHV3-53/3-66  
858 class. Automated and manual model building were iteratively performed using real space  
859 refinement in Phenix (Adams et al., 2004) and Coot (Emsley and Cowtan, 2004) respectively.  
860 EMRinger (Barad et al., 2015) and Molprobitry (Davis et al., 2004) were used to validate geometry  
861 and check structure quality at each iteration step. UCSF Chimera (Pettersen et al., 2004) and  
862 Chimera X (Pettersen et al., 2020) were used to calculate map-fitting cross correlation (Fit-in-Map  
863 tool) and to prepare figures.

864

### 865 **Octet Binding Experiments**

866 Binding of mAbs 4-3, B38, 910-30, and 1-20 to SAR-CoV-2 S2P D614 and D614G variants  
867 was assessed on a FortéBio Octet HTX instrument (FortéBio). Experiments were run in tilted  
868 black 384-well plates (Geiger Bio-One) at 30°C and 1,000 rpm agitation. Running buffer was  
869 comprised of 10mM of the corresponding pH buffer plus 150mM NaCl, 0.02% Tween20, 0.1%  
870 BSA and 0.05% sodium azide. The following buffers were used to achieve the range of pH: pH 9  
871 (borate), pH 8.5 (Tris), pH 8 (Tris), pH 7.4 (PBS), pH 7 (HEPES), pH 6.5 (MES), pH 6 (MES), pH  
872 5.5 (NaAc), pH 5 (NaAc), pH 4.5 (NaAc), pH 4.2 (NaAc), pH 4.0 (NaAc). 300nM IgG solution was  
873 used for immobilization at pH 7.4 on anti-human IgG Fc capture biosensors (FortéBio) that were  
874 pre-hydrated for 30 minutes. Sensors were then equilibrated in 7.4pH buffer for 30 seconds  
875 followed by 180 seconds in the altered pH buffer. Binding was assessed at 200nM S2P D614 or

876 D614G and response recorded for 180 seconds. Dissociation in the respective buffer was  
877 measured for 300 seconds. The Data Analysis Software HT v12.0 (Fortebio) was used to subtract  
878 reference well signal from loaded sensor dipped into buffer without spike protein. The maximum  
879 association response (nm) is reported at each pH.

880

### 881 **SPR Binding Experiments**

882 SPR binding experiments were performed using a Biacore T200 biosensor, equipped with  
883 a Series S SA chip. The running buffer varied depending on the pH of the binding reaction;  
884 experiments at pH 7.4 were performed in a running buffer of 10mM HEPES pH 7.4, 150mM NaCl,  
885 0.1% (v/v) Tween-20; at pH 5.5 experiments were performed in 10mM sodium acetate pH 5.5,  
886 150mM NaCl, 0.1% (v/v) Tween-20; and at pH 4.5 in 10mM sodium acetate pH 4.5, 150mM NaCl,  
887 0.1% (v/v) Tween-20. All measurements were performed at 25°C.

888 Biotinylated S2P was captured over independent flow cells at 750-900 RU. HKU910-30 and  
889 1-20 IgGs were tested over the biotinylated S2P surfaces at four concentrations ranging from 1-  
890 27nM, while B38 and 4-3 were tested at four concentrations ranging from 3-81nM, to account for  
891 higher binding KDs. Biotinylated RBD was captured over independent flow cells at 250-500 RU  
892 and B38 was tested at four concentrations ranging from 3-81nM, HKU910-30 and 4-3 were tested  
893 at four concentrations of 1-27 nM and 1-20 at four concentrations ranging from 0.333-9 nM, to  
894 account for differences in their binding affinities. To avoid the need for surface regeneration that  
895 arises with the slowly dissociating interactions, we used single-cycle kinetics binding experiments.  
896 The four concentrations for each IgG were prepared in running buffers at each of pH, using a  
897 three-fold dilution series.

898 Binding of HKU910-30, 4-3 and B38 over the S2P or RBD surface as well as over a  
899 streptavidin reference surface was monitored for 120s, followed by a dissociation phase of 120s-  
900 1080s depending on the interaction at 50µL/min. For the interaction of 1-20 with the RBD, which  
901 showed an unusually slow dissociation rate, an extended dissociation phase of 4500s was

902 necessary to extrapolate accurate apparent dissociation constants. Four blank buffer single  
903 cycles were performed by injecting running buffer instead of Fab to remove systematic noise from  
904 the binding signal. The data was processed and fit to 1:1 single cycle model using the Scrubber  
905 2.0 (BioLogic Software). The results from these assays, are reported in terms of apparent kinetic  
906 parameters and  $K_{DS}$  to account for potential avidity effects arising from the binding of bivalent  
907 IgGs to trivalent S2P.

908

## 909 **QUANTIFICATION AND STATISTICAL ANALYSIS**

910 IC50 calculations were reported using GraphPad Prism software (version 8.4.3). Briefly,  
911 experimental data was imported and modeled using a least squares regression method to fit the  
912 data to a variable slope (four parameter) inhibitor vs. response curve with bottom parameters  
913 constrained to zero. Flow cytometry analysis was carried out using FlowJo software (version  
914 10.4). The Spearman rank order correlation was calculated using cor.test function in base R.  
915 Spearman  $\rho$  and the p-values for the test were used to determine the strength of the correlation  
916 between tested variables.

917

## 918 **KEY RESOURCES TABLE**

919 **Unique link for KRT:** <https://star-methods.com/?rid=KRT5f99969f70be3>

920 **References**

- 921
- 922 Adams, P.D., Gopal, K., Grosse-Kunstleve, R.W., Hung, L.-W., Ioerger, T.R., McCoy, A.J.,  
923 Moriarty, N.W., Pai, R.K., Read, R.J., Romo, T.D., et al. (2004). Recent developments in the  
924 PHENIX software for automated crystallographic structure determination. *J. Synchrotron Radiat.*  
925 *11*, 53–55.
- 926 Barad, B.A., Echols, N., Wang, R.Y.-R., Cheng, Y., DiMaio, F., Adams, P.D., and Fraser, J.S.  
927 (2015). EMRinger: side chain-directed model and map validation for 3D cryo-electron  
928 microscopy. *Nat. Methods* *12*, 943–946.
- 929 Barnes, C.O., West, A.P., Huey-Tubman, K.E., Hoffmann, M.A.G., Sharaf, N.G., Hoffman, P.R.,  
930 Koranda, N., Gristick, H.B., Gaebler, C., Muecksch, F., et al. (2020). Structures of human  
931 antibodies bound to SARS-CoV-2 spike reveal common epitopes and recurrent features of  
932 antibodies. *Cell*.
- 933 Benatuil, L., Perez, J.M., Belk, J., and Hsieh, C.-M. (2010). An improved yeast transformation  
934 method for the generation of very large human antibody libraries. *Protein Eng. Des. Sel.* *23*,  
935 155–159.
- 936 Benton, D.J., Wrobel, A.G., Xu, P., Roustan, C., Martin, S.R., Rosenthal, P.B., Skehel, J.J., and  
937 Gamblin, S.J. (2020). Receptor binding and priming of the spike protein of SARS-CoV-2 for  
938 membrane fusion. *Nature* 1–8.
- 939 Boder, E.T., and Wittrup, K.D. (1997). Yeast surface display for screening combinatorial  
940 polypeptide libraries. *Nat. Biotechnol.* *15*, 553–557.
- 941 Bräuninger, A., Goossens, T., Rajewsky, K., and Küppers, R. (2001). Regulation of  
942 immunoglobulin light chain gene rearrangements during early B cell development in the human.  
943 *Eur. J. Immunol.* *31*, 3631–3637.
- 944 Brouwer, P.J.M., Caniels, T.G., Straten, K. van der, Snitselaar, J.L., Aldon, Y., Bangaru, S.,  
945 Torres, J.L., Okba, N.M.A., Claireaux, M., Kerster, G., et al. (2020). Potent neutralizing  
946 antibodies from COVID-19 patients define multiple targets of vulnerability. *Science*.
- 947 Cai, Y., Zhang, J., Xiao, T., Peng, H., Sterling, S.M., Walsh, R.M., Rawson, S., Rits-Volloch, S.,  
948 and Chen, B. (2020). Distinct conformational states of SARS-CoV-2 spike protein. *Science*  
949 eabd4251.
- 950 Cao, Y., Su, B., Guo, X., Sun, W., Deng, Y., Bao, L., Zhu, Q., Zhang, X., Zheng, Y., Geng, C.,  
951 et al. (2020). Potent Neutralizing Antibodies against SARS-CoV-2 Identified by High-  
952 Throughput Single-Cell Sequencing of Convalescent Patients' B Cells. *Cell*.
- 953 Catalan-Dibene, J. (2020). Human antibodies can neutralize SARS-CoV-2. *Nat. Rev. Immunol.*  
954 *20*, 350–350.
- 955 Chao, G., Lau, W.L., Hackel, B.J., Sazinsky, S.L., Lippow, S.M., and Wittrup, K.D. (2006).  
956 Isolating and engineering human antibodies using yeast surface display. *Nat. Protoc.* *1*, 755–768.

- 957 Chi, X., Yan, R., Zhang, J., Zhang, G., Zhang, Y., Hao, M., Zhang, Z., Fan, P., Dong, Y., Yang,  
958 Y., et al. (2020). A neutralizing human antibody binds to the N-terminal domain of the Spike  
959 protein of SARS-CoV-2. *Science* eabc6952.
- 960 Cucinotta, D., and Vanelli, M. (2020). WHO Declares COVID-19 a Pandemic. *Acta Bio Medica*  
961 *Atenei Parm.* *91*, 157–160.
- 962 Cui, J., Li, F., and Shi, Z.-L. (2019). Origin and evolution of pathogenic coronaviruses. *Nat. Rev.*  
963 *Microbiol.* *17*, 181–192.
- 964 Davis, I.W., Murray, L.W., Richardson, J.S., and Richardson, D.C. (2004). MOLPROBITY:  
965 structure validation and all-atom contact analysis for nucleic acids and their complexes. *Nucleic*  
966 *Acids Res.* *32*, W615-619.
- 967 DeKosky, B.J., Ippolito, G.C., Deschner, R.P., Lavinder, J.J., Wine, Y., Rawlings, B.M.,  
968 Varadarajan, N., Giesecke, C., Dörner, T., and Andrews, S.F. (2013). High-throughput  
969 sequencing of the paired human immunoglobulin heavy and light chain repertoire. *Nat.*  
970 *Biotechnol.* *31*, 166–169.
- 971 DeKosky, B.J., Kojima, T., Rodin, A., Charab, W., Ippolito, G.C., Ellington, A.D., and  
972 Georgiou, G. (2015). In-depth determination and analysis of the human paired heavy- and light-  
973 chain antibody repertoire. *Nat. Med.* *21*, 86–91.
- 974 Du, S., Cao, Y., Zhu, Q., Wang, G., Du, X., He, R., Xu, H., Zheng, Y., Wang, B., Bai, Y., et al.  
975 (2020). Structures of potent and convergent neutralizing antibodies bound to the SARS-CoV-2  
976 spike unveil a unique epitope responsible for exceptional potency. *BioRxiv* 2020.07.09.195263.
- 977 Emsley, P., and Cowtan, K. (2004). Coot: model-building tools for molecular graphics. *Acta*  
978 *Crystallogr. D Biol. Crystallogr.* *60*, 2126–2132.
- 979 Gorbalenya, A.E., and et al. (2020). The species Severe acute respiratory syndrome-related  
980 coronavirus: classifying 2019-nCoV and naming it SARS-CoV-2. *Nat. Microbiol.* *5*, 536.
- 981 Graham, R.L., and Baric, R.S. (2010). Recombination, Reservoirs, and the Modular Spike:  
982 Mechanisms of Coronavirus Cross-Species Transmission. *J. Virol.* *84*, 3134–3146.
- 983 Grubaugh, N.D., Hanage, W.P., and Rasmussen, A.L. (2020). Making Sense of Mutation: What  
984 D614G Means for the COVID-19 Pandemic Remains Unclear. *Cell* *182*, 794–795.
- 985 Guan, W., Ni, Z., Hu, Y., Liang, W., Ou, C., He, J., Liu, L., Shan, H., Lei, C., and Hui, D.S.  
986 (2020). Clinical characteristics of coronavirus disease 2019 in China. *N. Engl. J. Med.* *382*,  
987 1708–1720.
- 988 Han, Y., Duan, X., Yang, L., Nilsson-Payant, B.E., Wang, P., Duan, F., Tang, X., Yaron, T.M.,  
989 Zhang, T., Uhl, S., et al. (2020). Identification of SARS-CoV-2 inhibitors using lung and colonic  
990 organoids. *Nature*.



- 991 Hansen, J., Baum, A., Pascal, K.E., Russo, V., Giordano, S., Wloga, E., Fulton, B.O., Yan, Y.,  
992 Koon, K., Patel, K., et al. (2020). Studies in humanized mice and convalescent humans yield a  
993 SARS-CoV-2 antibody cocktail. *Science*.
- 994 Hoffmann, M., Kleine-Weber, H., Schroeder, S., Krüger, N., Herrler, T., Erichsen, S.,  
995 Schiergens, T.S., Herrler, G., Wu, N.-H., Nitsche, A., et al. (2020). SARS-CoV-2 Cell Entry  
996 Depends on ACE2 and TMPRSS2 and Is Blocked by a Clinically Proven Protease Inhibitor. *Cell*  
997 *181*, 271-280.e8.
- 998 Hou, Y.J., Chiba, S., Halfmann, P., Ehre, C., Kuroda, M., Dinnon, K.H., Leist, S.R., Schäfer, A.,  
999 Nakajima, N., Takahashi, K., et al. (2020). SARS-CoV-2 D614G variant exhibits efficient  
1000 replication ex vivo and transmission in vivo. *Science*.
- 1001 Huo, J., Zhao, Y., Ren, J., Zhou, D., Duyvesteyn, H.M.E., Ginn, H.M., Carrique, L.,  
1002 Malinauskas, T., Ruza, R.R., Shah, P.N.M., et al. (2020). Neutralization of SARS-CoV-2 by  
1003 Destruction of the Prefusion Spike. *Cell Host Microbe* *28*, 445-454.e6.
- 1004 Hurlburt, N.K., Seydoux, E., Wan, Y.-H., Edara, V.V., Stuart, A.B., Feng, J., Suthar, M.S.,  
1005 McGuire, A.T., Stamatatos, L., and Pancera, M. (2020). Structural basis for potent neutralization  
1006 of SARS-CoV-2 and role of antibody affinity maturation. *Nat. Commun.* *11*, 5413.
- 1007 Jiang, S., Shi, Z., Shu, Y., Song, J., Gao, G.F., Tan, W., and Guo, D. (2020). A distinct name is  
1008 needed for the new coronavirus. *The Lancet* *395*, 948–949.
- 1009 Ju, B., Zhang, Q., Ge, J., Wang, R., Sun, J., Ge, X., Yu, J., Shan, S., Zhou, B., Song, S., et al.  
1010 (2020). Human neutralizing antibodies elicited by SARS-CoV-2 infection. *Nature* 1–8.
- 1011 Korber, B., Fischer, W.M., Gnanakaran, S., Yoon, H., Theiler, J., Abfalterer, W., Hengartner, N.,  
1012 Giorgi, E.E., Bhattacharya, T., Foley, B., et al. (2020). Tracking Changes in SARS-CoV-2 Spike:  
1013 Evidence that D614G Increases Infectivity of the COVID-19 Virus. *Cell* *182*, 812-827.e19.
- 1014 Ksiazek, T.G., Erdman, D., Goldsmith, C.S., Zaki, S.R., Peret, T., Emery, S., Tong, S., Urbani,  
1015 C., Comer, J.A., and Lim, W. (2003). A novel coronavirus associated with severe acute  
1016 respiratory syndrome. *N. Engl. J. Med.* *348*, 1953–1966.
- 1017 Lagerman, C.E., Acevedo, S.N.L., Fahad, A.S., Hailemariam, A.T., Madan, B., and DeKosky,  
1018 B.J. (2019). Ultrasonically-guided flow focusing generates precise emulsion droplets for high-  
1019 throughput single cell analyses. *J. Biosci. Bioeng.* *128*, 226–233.
- 1020 Lefranc, M.-P., Pommié, C., Ruiz, M., Giudicelli, V., Foulquier, E., Truong, L., Thouvenin-  
1021 Contet, V., and Lefranc, G. (2003). IMGT unique numbering for immunoglobulin and T cell  
1022 receptor variable domains and Ig superfamily V-like domains. *Dev. Comp. Immunol.* *27*, 55–77.
- 1023 Liu, L., Wang, P., Nair, M.S., Yu, J., Rapp, M., Wang, Q., Luo, Y., Chan, J.F.-W., Sahi, V.,  
1024 Figueroa, A., et al. (2020a). Potent neutralizing antibodies against multiple epitopes on SARS-  
1025 CoV-2 spike. *Nature* *584*, 450–456.

- 1026 Liu, Y., Ning, Z., Chen, Y., Guo, M., Liu, Y., Gali, N.K., Sun, L., Duan, Y., Cai, J., Westerdahl,  
1027 D., et al. (2020b). Aerodynamic analysis of SARS-CoV-2 in two Wuhan hospitals. *Nature* 582,  
1028 557–560.
- 1029 Long, S.W., Olsen, R.J., Christensen, P.A., Bernard, D.W., Davis, J.J., Shukla, M., Nguyen, M.,  
1030 Saavedra, M.O., Yerramilli, P., Pruitt, L., et al. (2020). Molecular Architecture of Early  
1031 Dissemination and Massive Second Wave of the SARS-CoV-2 Virus in a Major Metropolitan  
1032 Area. *MedRxiv* 2020.09.22.20199125.
- 1033 Mansbach, R.A., Chakraborty, S., Nguyen, K., Montefiori, D.C., Korber, B., and Gnanakaran, S.  
1034 (2020). The SARS-CoV-2 Spike Variant D614G Favors an Open Conformational State. *BioRxiv*  
1035 2020.07.26.219741.
- 1036 McDaniel, J.R., DeKosky, B.J., Tanno, H., Ellington, A.D., and Georgiou, G. (2016). Ultra-high-  
1037 throughput sequencing of the immune receptor repertoire from millions of lymphocytes. *Nat.*  
1038 *Protoc.* 11, 429–442.
- 1039 Nie, J., Li, Q., Wu, J., Zhao, C., Hao, H., Liu, H., Zhang, L., Nie, L., Qin, H., Wang, M., et al.  
1040 (2020). Establishment and validation of a pseudovirus neutralization assay for SARS-CoV-2.  
1041 *Emerg. Microbes Infect.* 9, 680–686.
- 1042 Ou, X., Liu, Y., Lei, X., Li, P., Mi, D., Ren, L., Guo, L., Guo, R., Chen, T., Hu, J., et al. (2020).  
1043 Characterization of spike glycoprotein of SARS-CoV-2 on virus entry and its immune cross-  
1044 reactivity with SARS-CoV. *Nat. Commun.* 11, 1620.
- 1045 Pettersen, E.F., Goddard, T.D., Huang, C.C., Couch, G.S., Greenblatt, D.M., Meng, E.C., and  
1046 Ferrin, T.E. (2004). UCSF Chimera—a visualization system for exploratory research and  
1047 analysis. *J. Comput. Chem.* 25, 1605–1612.
- 1048 Pettersen, E.F., Goddard, T.D., Huang, C.C., Meng, E.C., Couch, G.S., Croll, T.I., Morris, J.H.,  
1049 and Ferrin, T.E. (2020). UCSF ChimeraX: Structure visualization for researchers, educators, and  
1050 developers. *Protein Sci. Publ. Protein Soc.*
- 1051 Plante, J.A., Liu, Y., Liu, J., Xia, H., Johnson, B.A., Lokugamage, K.G., Zhang, X., Muruato,  
1052 A.E., Zou, J., Fontes-Garfias, C.R., et al. (2020). Spike mutation D614G alters SARS-CoV-2  
1053 fitness and neutralization susceptibility. *BioRxiv* 2020.09.01.278689.
- 1054 Punjani, A., Rubinstein, J.L., Fleet, D.J., and Brubaker, M.A. (2017). cryoSPARC: algorithms  
1055 for rapid unsupervised cryo-EM structure determination. *Nat. Methods* 14, 290–296.
- 1056 Robbiani, D.F., Gaebler, C., Muecksch, F., Lorenzi, J.C.C., Wang, Z., Cho, A., Agudelo, M.,  
1057 Barnes, C.O., Gazumyan, A., Finkin, S., et al. (2020). Convergent antibody responses to SARS-  
1058 CoV-2 in convalescent individuals. *Nature* 1–8.
- 1059 Rogers, T.F., Zhao, F., Huang, D., Beutler, N., Burns, A., He, W., Limbo, O., Smith, C., Song,  
1060 G., and Woehl, J. (2020). Isolation of potent SARS-CoV-2 neutralizing antibodies and protection  
1061 from disease in a small animal model. *Science*.

- 1062 Scheres, S.H.W. (2012). RELION: implementation of a Bayesian approach to cryo-EM structure  
1063 determination. *J. Struct. Biol.* *180*, 519–530.
- 1064 Sethna, Z., Elhanati, Y., Callan, C.G., Walczak, A.M., and Mora, T. (2019). OLGA: fast  
1065 computation of generation probabilities of B- and T-cell receptor amino acid sequences and  
1066 motifs. *Bioinforma. Oxf. Engl.* *35*, 2974–2981.
- 1067 Seydoux, E., Homad, L.J., MacCamy, A.J., Parks, K.R., Hurlburt, N.K., Jennewein, M.F., Akins,  
1068 N.R., Stuart, A.B., Wan, Y.-H., Feng, J., et al. (2020). Analysis of a SARS-CoV-2-Infected  
1069 Individual Reveals Development of Potent Neutralizing Antibodies with Limited Somatic  
1070 Mutation. *Immunity*.
- 1071 Shi, R., Shan, C., Duan, X., Chen, Z., Liu, P., Song, J., Song, T., Bi, X., Han, C., Wu, L., et al.  
1072 (2020). A human neutralizing antibody targets the receptor-binding site of SARS-CoV-2. *Nature*  
1073 1–5.
- 1074 Sickmier, E.A., Kurzeja, R.J.M., Michelsen, K., Vazir, M., Yang, E., and Tasker, A.S. (2016).  
1075 The Panitumumab EGFR Complex Reveals a Binding Mechanism That Overcomes Cetuximab  
1076 Induced Resistance. *PloS One* *11*, e0163366.
- 1077 Soto, C., Bombardi, R.G., Branchizio, A., Kose, N., Matta, P., Sevy, A.M., Sinkovits, R.S.,  
1078 Gilchuk, P., Finn, J.A., and Crowe, J.E. (2019). High frequency of shared clonotypes in human B  
1079 cell receptor repertoires. *Nature* *566*, 398–402.
- 1080 Starr, T.N., Greaney, A.J., Hilton, S.K., Crawford, K.H., Navarro, M.J., Bowen, J.E., Tortorici,  
1081 M.A., Walls, A.C., Veessler, D., and Bloom, J.D. (2020). Deep mutational scanning of SARS-  
1082 CoV-2 receptor binding domain reveals constraints on folding and ACE2 binding. *BioRxiv*.
- 1083 Suloway, C., Pulokas, J., Fellmann, D., Cheng, A., Guerra, F., Quispe, J., Stagg, S., Potter, C.S.,  
1084 and Carragher, B. (2005). Automated molecular microscopy: the new Legimon system. *J. Struct.*  
1085 *Biol.* *151*, 41–60.
- 1086 Tang, T., Bidon, M., Jaimes, J.A., Whittaker, G.R., and Daniel, S. (2020). Coronavirus  
1087 membrane fusion mechanism offers a potential target for antiviral development. *Antiviral Res.*  
1088 *178*, 104792.
- 1089 Ter Meulen, J., Brink, E.N. van den, Poon, L.L.M., Marissen, W.E., Leung, C.S.W., Cox, F.,  
1090 Cheung, C.Y., Bakker, A.Q., Bogaards, J.A., Deventer, E. van, et al. (2006). Human Monoclonal  
1091 Antibody Combination against SARS Coronavirus: Synergy and Coverage of Escape Mutants.  
1092 *PLOS Med.* *3*, e237.
- 1093 To, K.K.-W., Tsang, O.T.-Y., Leung, W.-S., Tam, A.R., Wu, T.-C., Lung, D.C., Yip, C.C.-Y.,  
1094 Cai, J.-P., Chan, J.M.-C., Chik, T.S.-H., et al. (2020). Temporal profiles of viral load in posterior  
1095 oropharyngeal saliva samples and serum antibody responses during infection by SARS-CoV-2:  
1096 an observational cohort study. *Lancet Infect. Dis.* *20*, 565–574.

- 1097 Tortorici, M.A., Beltramello, M., Lempp, F.A., Pinto, D., Dang, H.V., Rosen, L.E., McCallum,  
1098 M., Bowen, J., Minola, A., Jaconi, S., et al. (2020). Ultrapotent human antibodies protect against  
1099 SARS-CoV-2 challenge via multiple mechanisms. *Science* eabe3354.
- 1100 Volz, E.M., Hill, V., McCrone, J.T., Price, A., Jorgensen, D., O'Toole, A., Southgate, J.A.,  
1101 Johnson, R., Jackson, B., Nascimento, F.F., et al. (2020). Evaluating the effects of SARS-CoV-2  
1102 Spike mutation D614G on transmissibility and pathogenicity. *MedRxiv* 2020.07.31.20166082.
- 1103 Walls, A.C., Park, Y.-J., Tortorici, M.A., Wall, A., McGuire, A.T., and Velesler, D. (2020).  
1104 Structure, Function, and Antigenicity of the SARS-CoV-2 Spike Glycoprotein. *Cell* *181*, 281-  
1105 292.e6.
- 1106 Wang, B., DeKosky, B.J., Timm, M.R., Lee, J., Normandin, E., Misasi, J., Kong, R., McDaniel,  
1107 J.R., Delidakis, G., Leigh, K.E., et al. (2018). Functional interrogation and mining of natively  
1108 paired human V H :V L antibody repertoires. *Nat. Biotechnol.* *36*, 152–155.
- 1109 Wang, C., Li, W., Drabek, D., Okba, N.M.A., van Haperen, R., Osterhaus, A.D.M.E., van  
1110 Kuppeveld, F.J.M., Haagmans, B.L., Grosveld, F., and Bosch, B.-J. (2020a). A human  
1111 monoclonal antibody blocking SARS-CoV-2 infection. *Nat. Commun.* *11*.
- 1112 Wang, P., Liu, L., Nair, M.S., Yin, M.T., Luo, Y., Wang, Q., Yuan, T., Mori, K., Solis, A.G., and  
1113 Yamashita, M. (2020b). SARS-CoV-2 Neutralizing Antibody Responses Are More Robust in  
1114 Patients with Severe Disease. *BioRxiv*.
- 1115 Weisblum, Y., Schmidt, F., Zhang, F., DaSilva, J., Poston, D., Lorenzi, J.C.C., Muecksch, F.,  
1116 Rutkowska, M., Hoffmann, H.-H., Michailidis, E., et al. (2020). Escape from neutralizing  
1117 antibodies by SARS-CoV-2 spike protein variants. *BioRxiv* 2020.07.21.214759.
- 1118 Weissman, D., Alameh, M.-G., Silva, T. de, Collini, P., Hornsby, H., Brown, R., LaBranche,  
1119 C.C., Edwards, R.J., Sutherland, L., Santra, S., et al. (2020). D614G Spike Mutation Increases  
1120 SARS CoV-2 Susceptibility to Neutralization. *MedRxiv* 2020.07.22.20159905.
- 1121 Whitehead, T.A., Chevalier, A., Song, Y., Dreyfus, C., Fleishman, S.J., De Mattos, C., Myers,  
1122 C.A., Kamisetty, H., Blair, P., Wilson, I.A., et al. (2012). Optimization of affinity, specificity and  
1123 function of designed influenza inhibitors using deep sequencing. *Nat. Biotechnol.* *30*, 543–548.
- 1124 Whitt, M.A. (2010). Generation of VSV Pseudotypes Using Recombinant  $\Delta$ G-VSV for Studies  
1125 on Virus Entry, Identification of Entry Inhibitors, and Immune Responses to Vaccines. *J. Virol.*  
1126 *Methods* *169*, 365–374.
- 1127 de Wit, E., van Doremalen, N., Falzarano, D., and Munster, V.J. (2016). SARS and MERS:  
1128 recent insights into emerging coronaviruses. *Nat. Rev. Microbiol.* *14*, 523–534.
- 1129 Wrapp, D., Wang, N., Corbett, K.S., Goldsmith, J.A., Hsieh, C.-L., Abiona, O., Graham, B.S.,  
1130 and McLellan, J.S. (2020a). Cryo-EM structure of the 2019-nCoV spike in the prefusion  
1131 conformation. *Science*.

- 1132 Wrapp, D., De Vlieger, D., Corbett, K.S., Torres, G.M., Wang, N., Van Breedam, W., Roose, K.,  
1133 van Schie, L., Hoffmann, M., Pöhlmann, S., et al. (2020b). Structural Basis for Potent  
1134 Neutralization of Betacoronaviruses by Single-Domain Camelid Antibodies. *Cell* *181*, 1004-  
1135 1015.e15.
- 1136 Wu, N.C., Yuan, M., Liu, H., Lee, C.-C.D., Zhu, X., Bangaru, S., Torres, J.L., Caniels, T.G.,  
1137 Brouwer, P.J.M., van Gils, M.J., et al. (2020a). An Alternative Binding Mode of IGHV3-53  
1138 Antibodies to the SARS-CoV-2 Receptor Binding Domain. *Cell Rep.* *33*, 108274.
- 1139 Wu, Y., Wang, F., Shen, C., Peng, W., Li, D., Zhao, C., Li, Z., Li, S., Bi, Y., Yang, Y., et al.  
1140 (2020b). A noncompeting pair of human neutralizing antibodies block COVID-19 virus binding  
1141 to its receptor ACE2. *Science* *368*, 1274–1278.
- 1142 Ye, J., Ma, N., Madden, T.L., and Ostell, J.M. (2013). IgBLAST: an immunoglobulin variable  
1143 domain sequence analysis tool. *Nucleic Acids Res.* *41*, W34-40.
- 1144 Yuan, M., Liu, H., Wu, N.C., Lee, C.-C.D., Zhu, X., Zhao, F., Huang, D., Yu, W., Hua, Y., Tien,  
1145 H., et al. (2020a). Structural basis of a shared antibody response to SARS-CoV-2. *Science* *369*,  
1146 1119–1123.
- 1147 Yuan, M., Wu, N.C., Zhu, X., Lee, C.-C.D., So, R.T., Lv, H., Mok, C.K., and Wilson, I.A.  
1148 (2020b). A highly conserved cryptic epitope in the receptor binding domains of SARS-CoV-2  
1149 and SARS-CoV. *Science* *368*, 630–633.
- 1150 Yurkovetskiy, L., Wang, X., Pascal, K.E., Tomkins-Tinch, C., Nyalile, T.P., Wang, Y., Baum,  
1151 A., Diehl, W.E., Dauphin, A., Carbone, C., et al. (2020). Structural and Functional Analysis of  
1152 the D614G SARS-CoV-2 Spike Protein Variant. *Cell* *183*, 739-751.e8.
- 1153 Zaki, A.M., Van Boheemen, S., Bestebroer, T.M., Osterhaus, A.D., and Fouchier, R.A. (2012).  
1154 Isolation of a novel coronavirus from a man with pneumonia in Saudi Arabia. *N. Engl. J. Med.*  
1155 *367*, 1814–1820.
- 1156 Zhang, L., Jackson, C.B., Mou, H., Ojha, A., Rangarajan, E.S., Izard, T., Farzan, M., and Choe,  
1157 H. (2020). The D614G mutation in the SARS-CoV-2 spike protein reduces S1 shedding and  
1158 increases infectivity. *BioRxiv* 2020.06.12.148726.
- 1159 Zhou, D., Duyvesteyn, H.M.E., Chen, C.-P., Huang, C.-G., Chen, T.-H., Shih, S.-R., Lin, Y.-C.,  
1160 Cheng, C.-Y., Cheng, S.-H., Huang, Y.-C., et al. (2020a). Structural basis for the neutralization  
1161 of SARS-CoV-2 by an antibody from a convalescent patient. *Nat. Struct. Mol. Biol.* *27*, 950–  
1162 958.
- 1163 Zhou, P., Yang, X.-L., Wang, X.-G., Hu, B., Zhang, L., Zhang, W., Si, H.-R., Zhu, Y., Li, B.,  
1164 and Huang, C.-L. (2020b). A pneumonia outbreak associated with a new coronavirus of probable  
1165 bat origin. *Nature* *579*, 270–273.
- 1166 Zhou, T., Zhu, J., Wu, X., Moquin, S., Zhang, B., Acharya, P., Georgiev, I.S., Altae-Tran, H.R.,  
1167 Chuang, G.-Y., Joyce, M.G., et al. (2013). Multidonor Analysis Reveals Structural Elements,

- 1168 Genetic Determinants, and Maturation Pathway for HIV-1 Neutralization by VRC01-Class  
1169 Antibodies. *Immunity* 39, 245–258.
- 1170 Zhou, T., Tsybovsky, Y., Olia, A.S., Gorman, J., Rapp, M.A., Cerutti, G., Katsamba, P.S.,  
1171 Nazzari, A., Schön, A., Wang, P., et al. (2020c). Cryo-EM Structures of SARS-CoV-2 Spike  
1172 without and with ACE2 Reveal a pH-Dependent Switch to Mediate Endosomal Positioning of  
1173 Receptor-Binding Domains. *Cell Host Microbe Advanced Online Publication*,  
1174 2020.07.04.187989.
- 1175 Zhu, J., Wu, X., Zhang, B., McKee, K., O'Dell, S., Soto, C., Zhou, T., Casazza, J.P., NISC  
1176 Comparative Sequencing Program, Mullikin, J.C., et al. (2013). De novo identification of  
1177 VRC01 class HIV-1-neutralizing antibodies by next-generation sequencing of B-cell transcripts.  
1178 *Proc. Natl. Acad. Sci. U. S. A.* 110, E4088-4097.
- 1179 Zhu, N., Zhang, D., Wang, W., Li, X., Yang, B., Song, J., Zhao, X., Huang, B., Shi, W., and Lu,  
1180 R. (2020). A novel coronavirus from patients with pneumonia in China, 2019. *N. Engl. J. Med.*
- 1181 Zost, S.J., Gilchuk, P., Chen, R.E., Case, J.B., Reidy, J.X., Trivette, A., Nargi, R.S., Sutton, R.E.,  
1182 Suryadevara, N., Chen, E.C., et al. (2020). Rapid isolation and profiling of a diverse panel of  
1183 human monoclonal antibodies targeting the SARS-CoV-2 spike protein. *Nat. Med.*
- 1184

**Figure 1. A novel SARS-CoV-2 neutralizer in the reproducible IGHV3-53/3-66 antibody class targets the ACE2 binding site of both ordered and disassembled spike.**

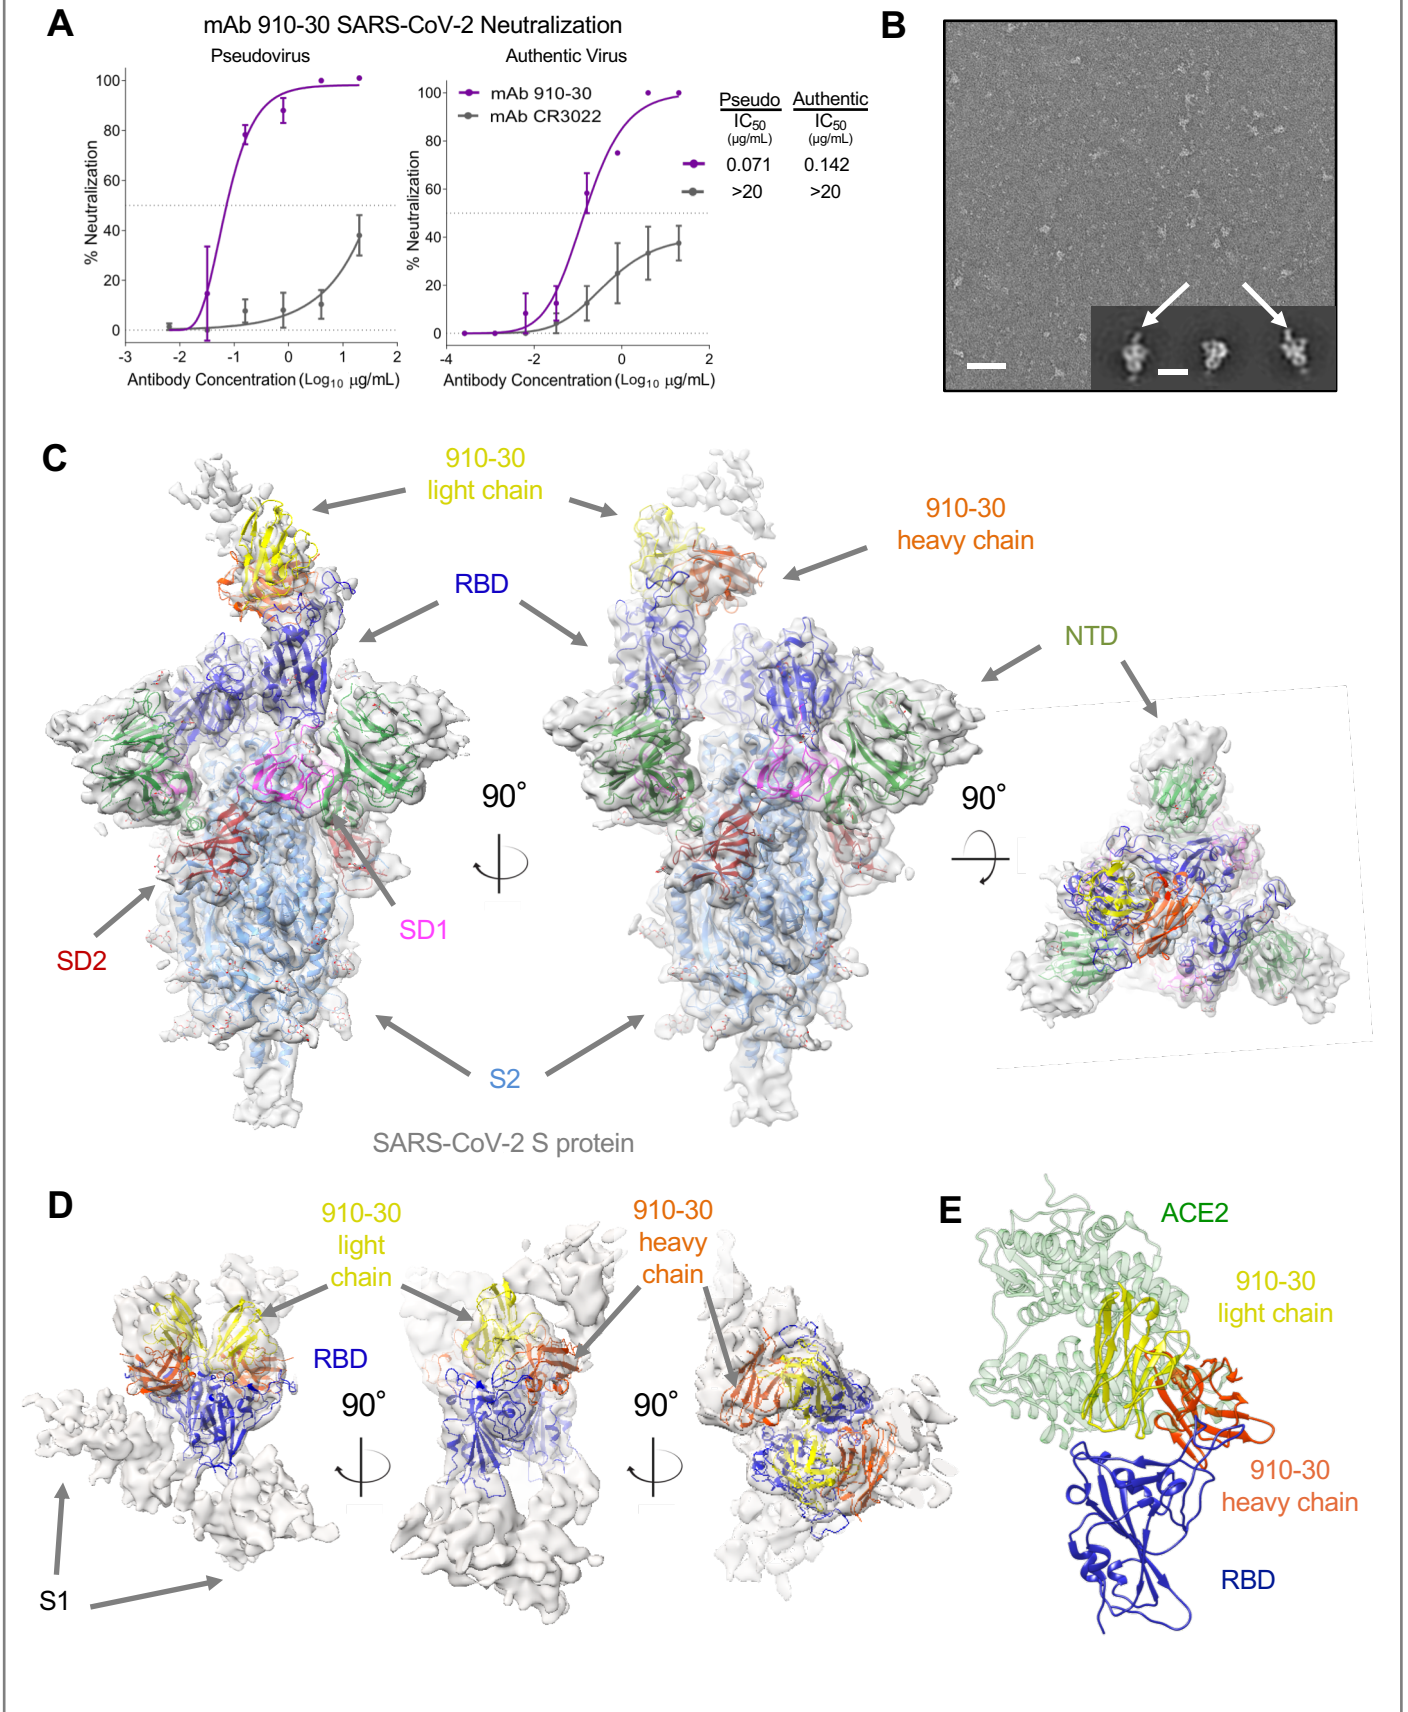

**Figure 2. IGHV3-53/3-66 class neutralization potency is driven by strong competition with ACE2 for spike S2P recognition.**

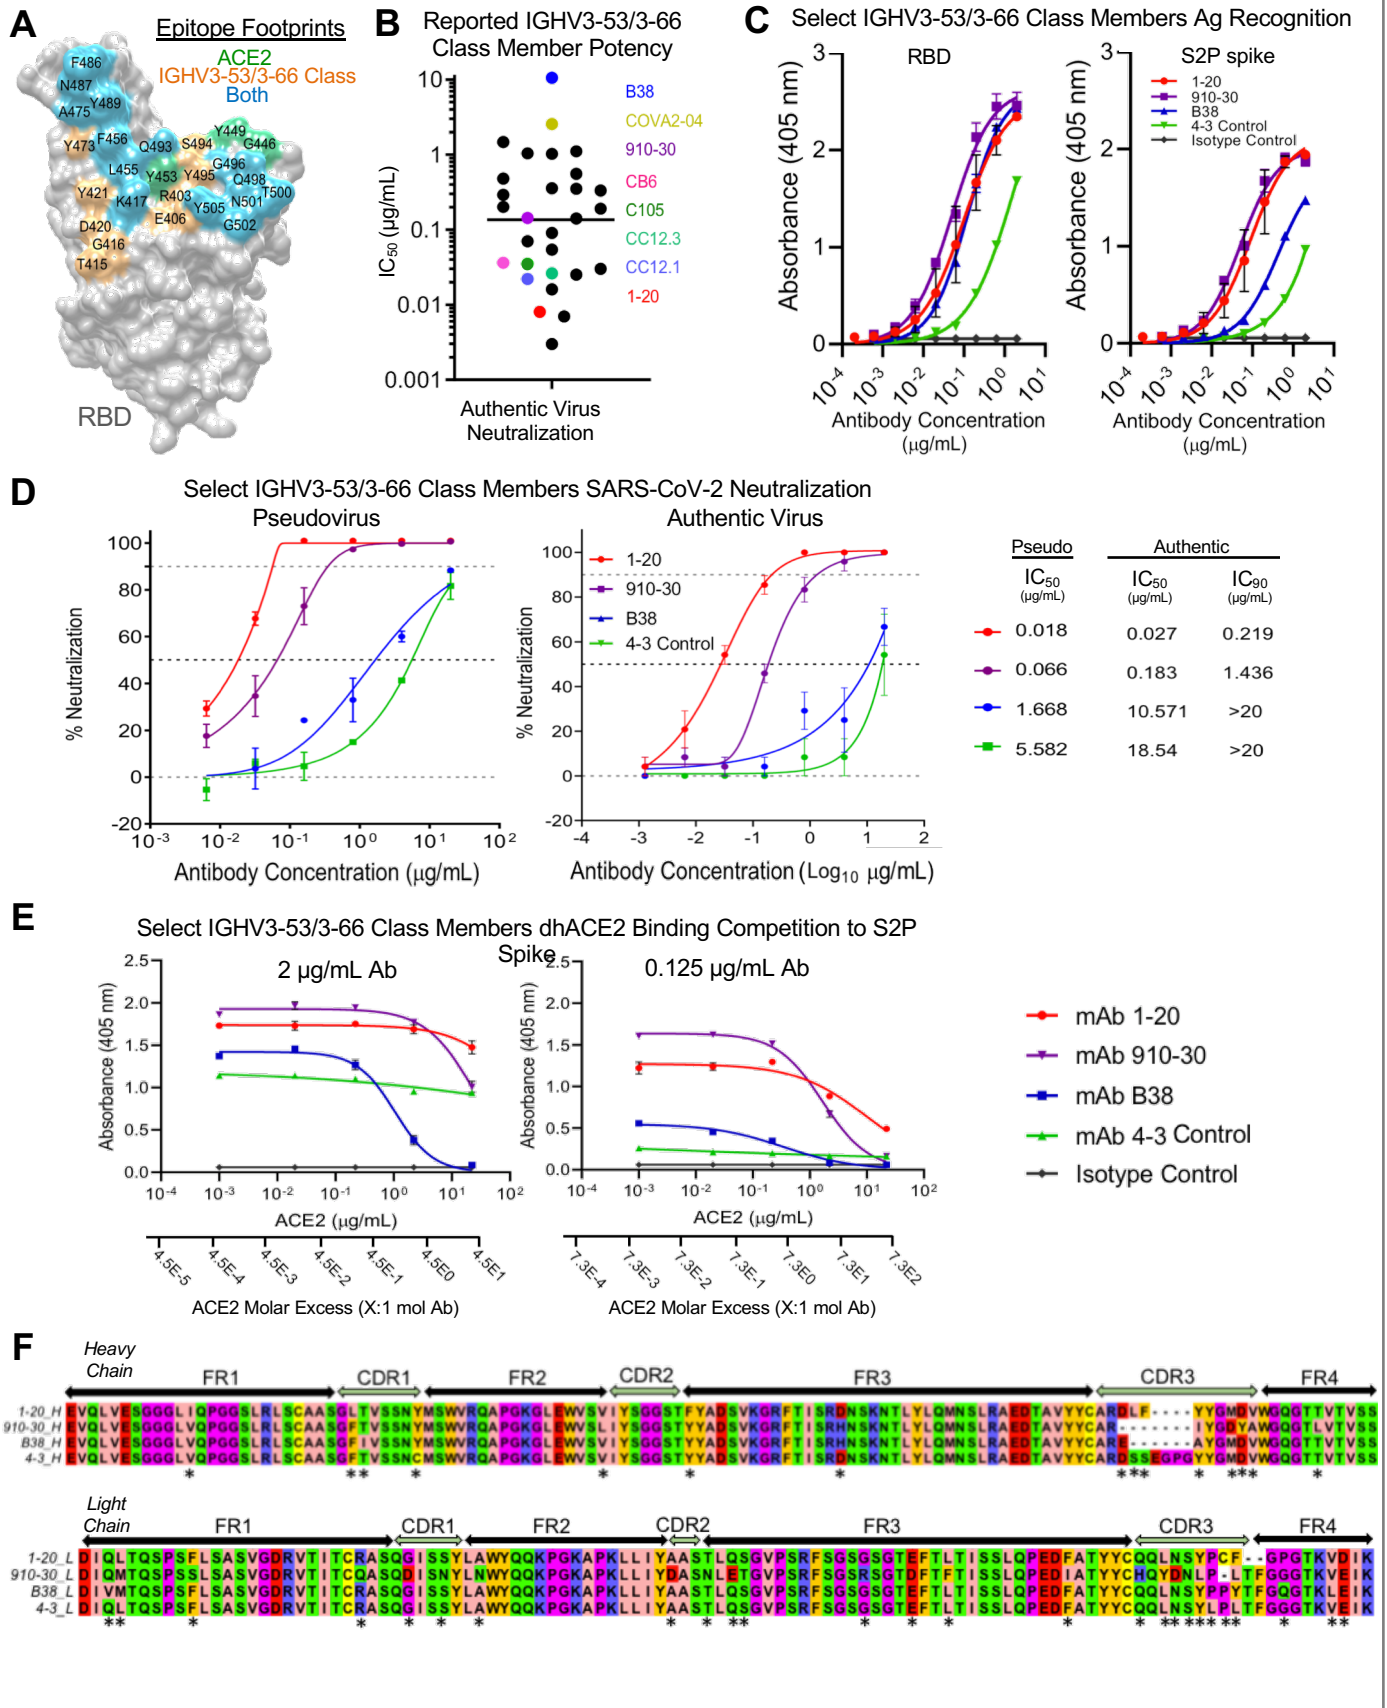



**Figure 3. Heavy and light chain analyses reveal critical contributions of both VH and VL for potent antibody neutralization in the IGHV3-53/3-66 antibody class.**

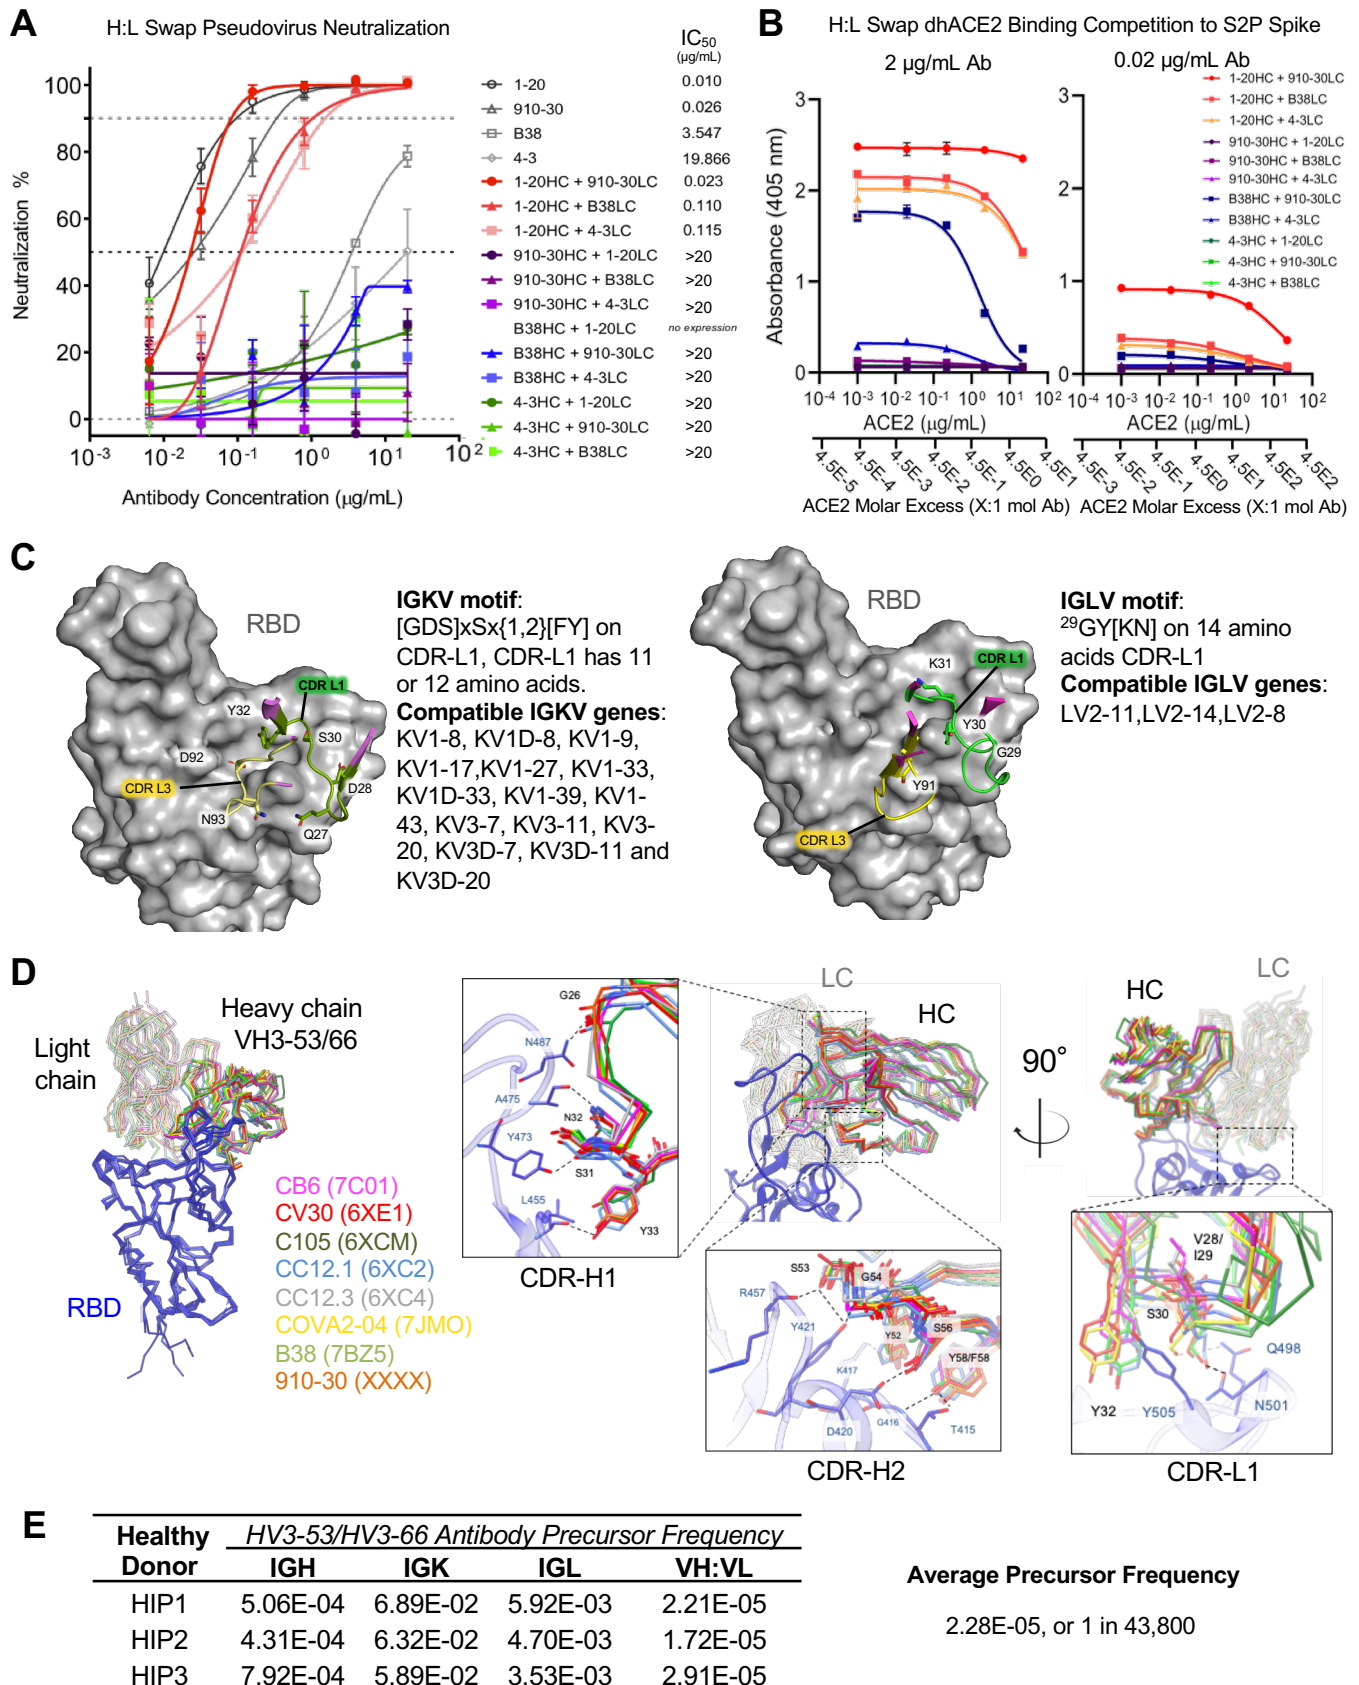

**Figure 4. Up/down conformational changes of the RBD influences IGHV3-53/3-66 antibody class recognition of spike protein across serological to endosome pH range.**

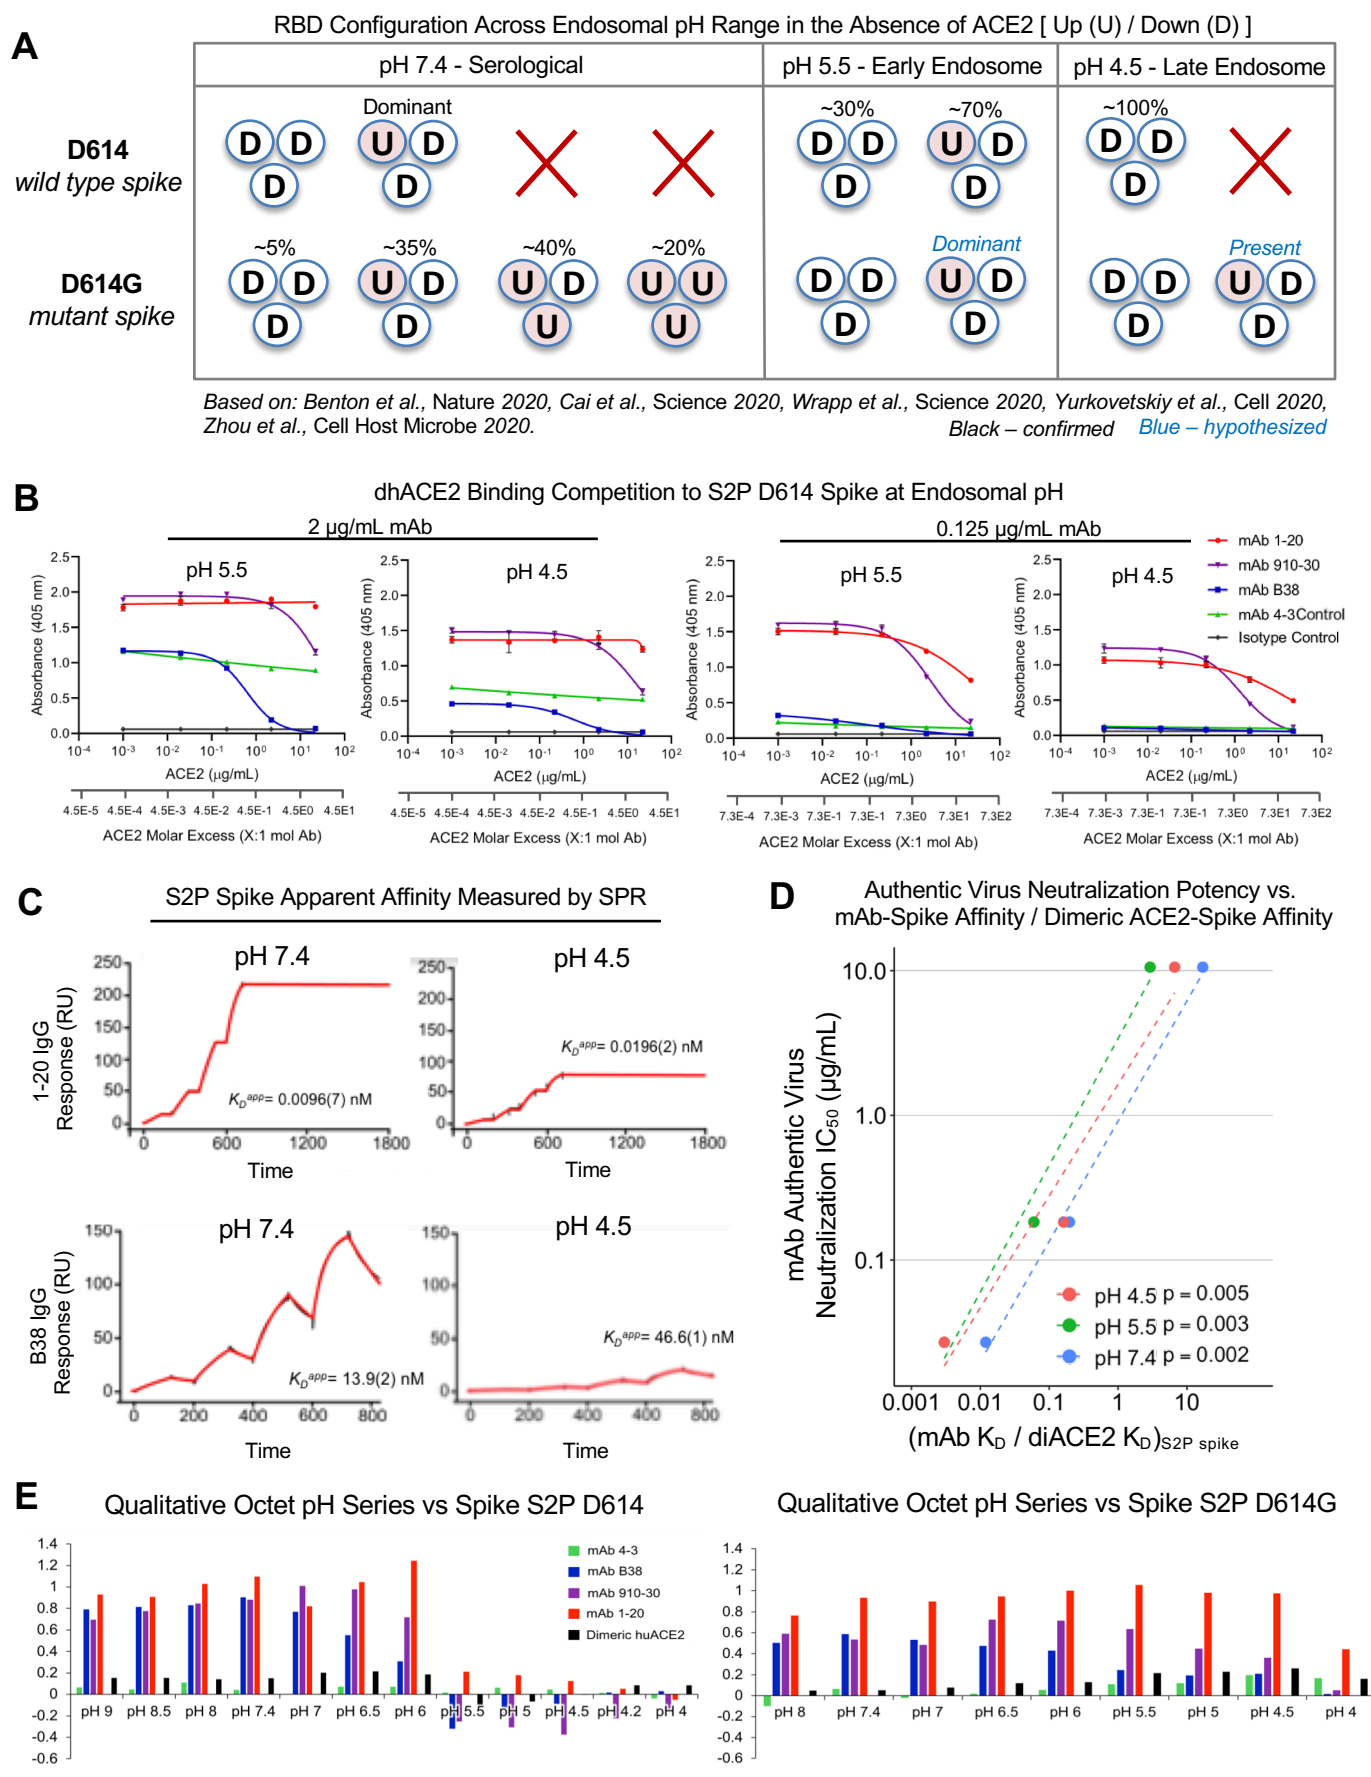

**Supplementary Figure 1. Overview of 910-30 discovery from a convalescent COVID-19 patient utilizing natively paired antibody fragment yeast display, FACS bio-panning, and soluble characterization.**

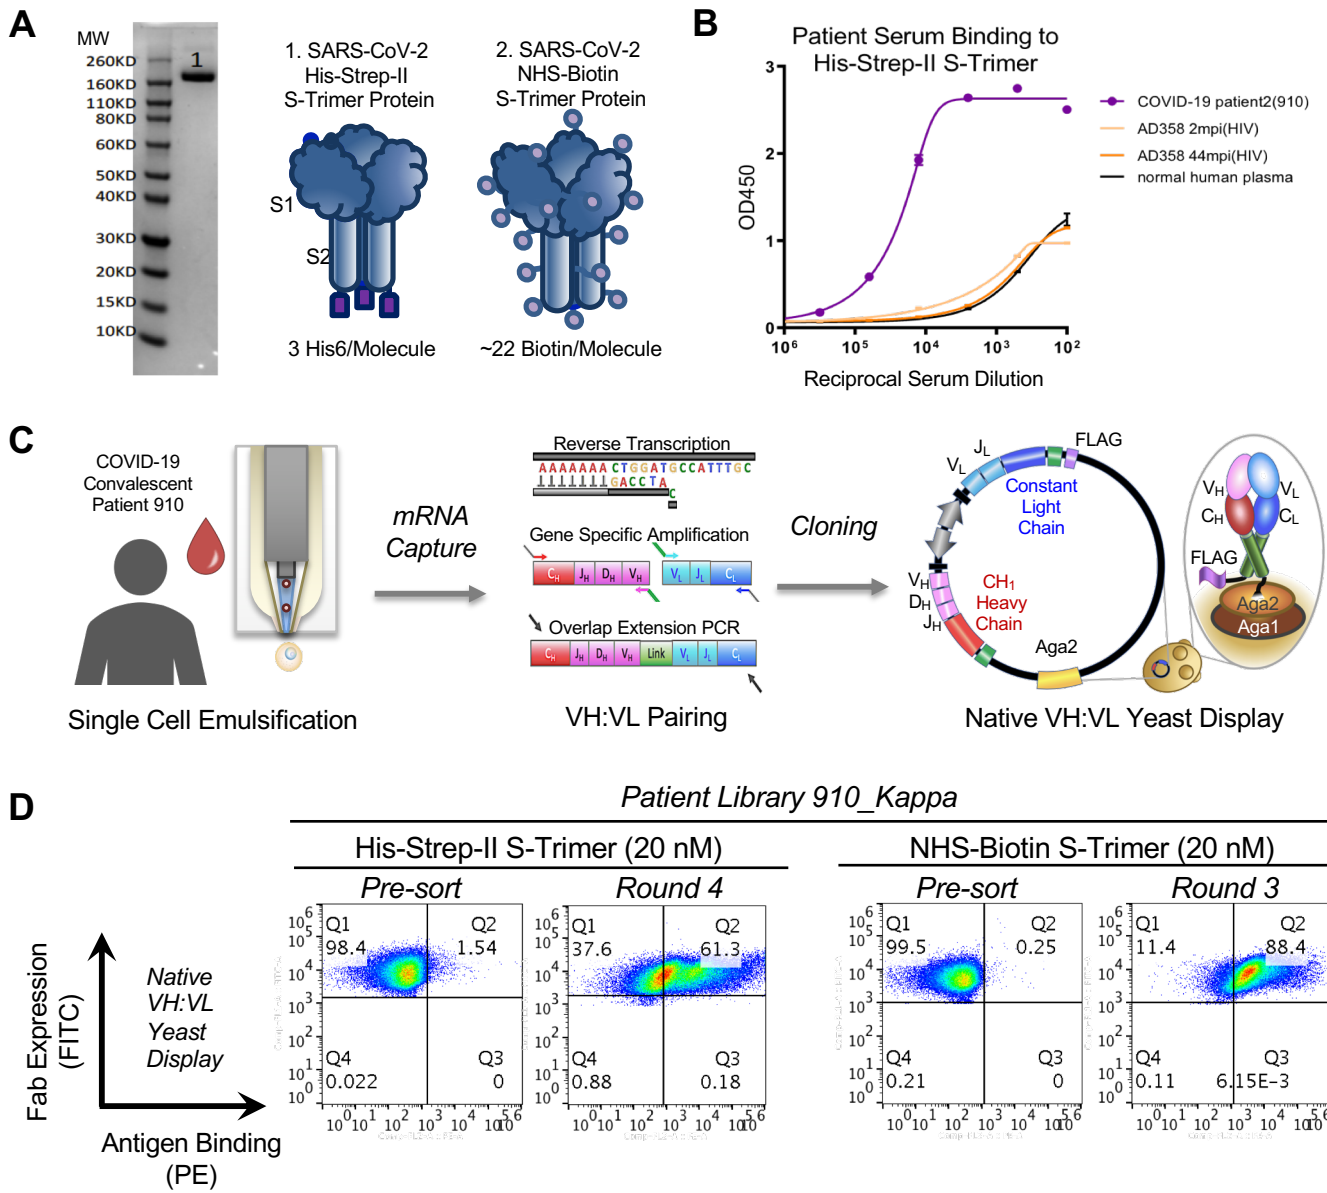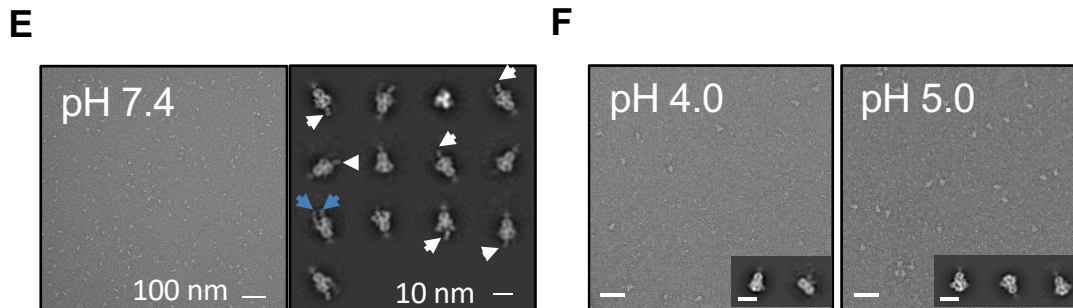

## Supplementary Figure 2

**Supplementary Figure 2. Cryo-EM analysis of 910-30 Fab in complex with SARS-CoV-2 spike at pH 5.5. Sample 1 obtained mixing 910-30 Fab and spike in a 1:1 molar ratio, sample 2 obtained mixing 910-30 Fab and spike in a 9:1 molar ratio.**

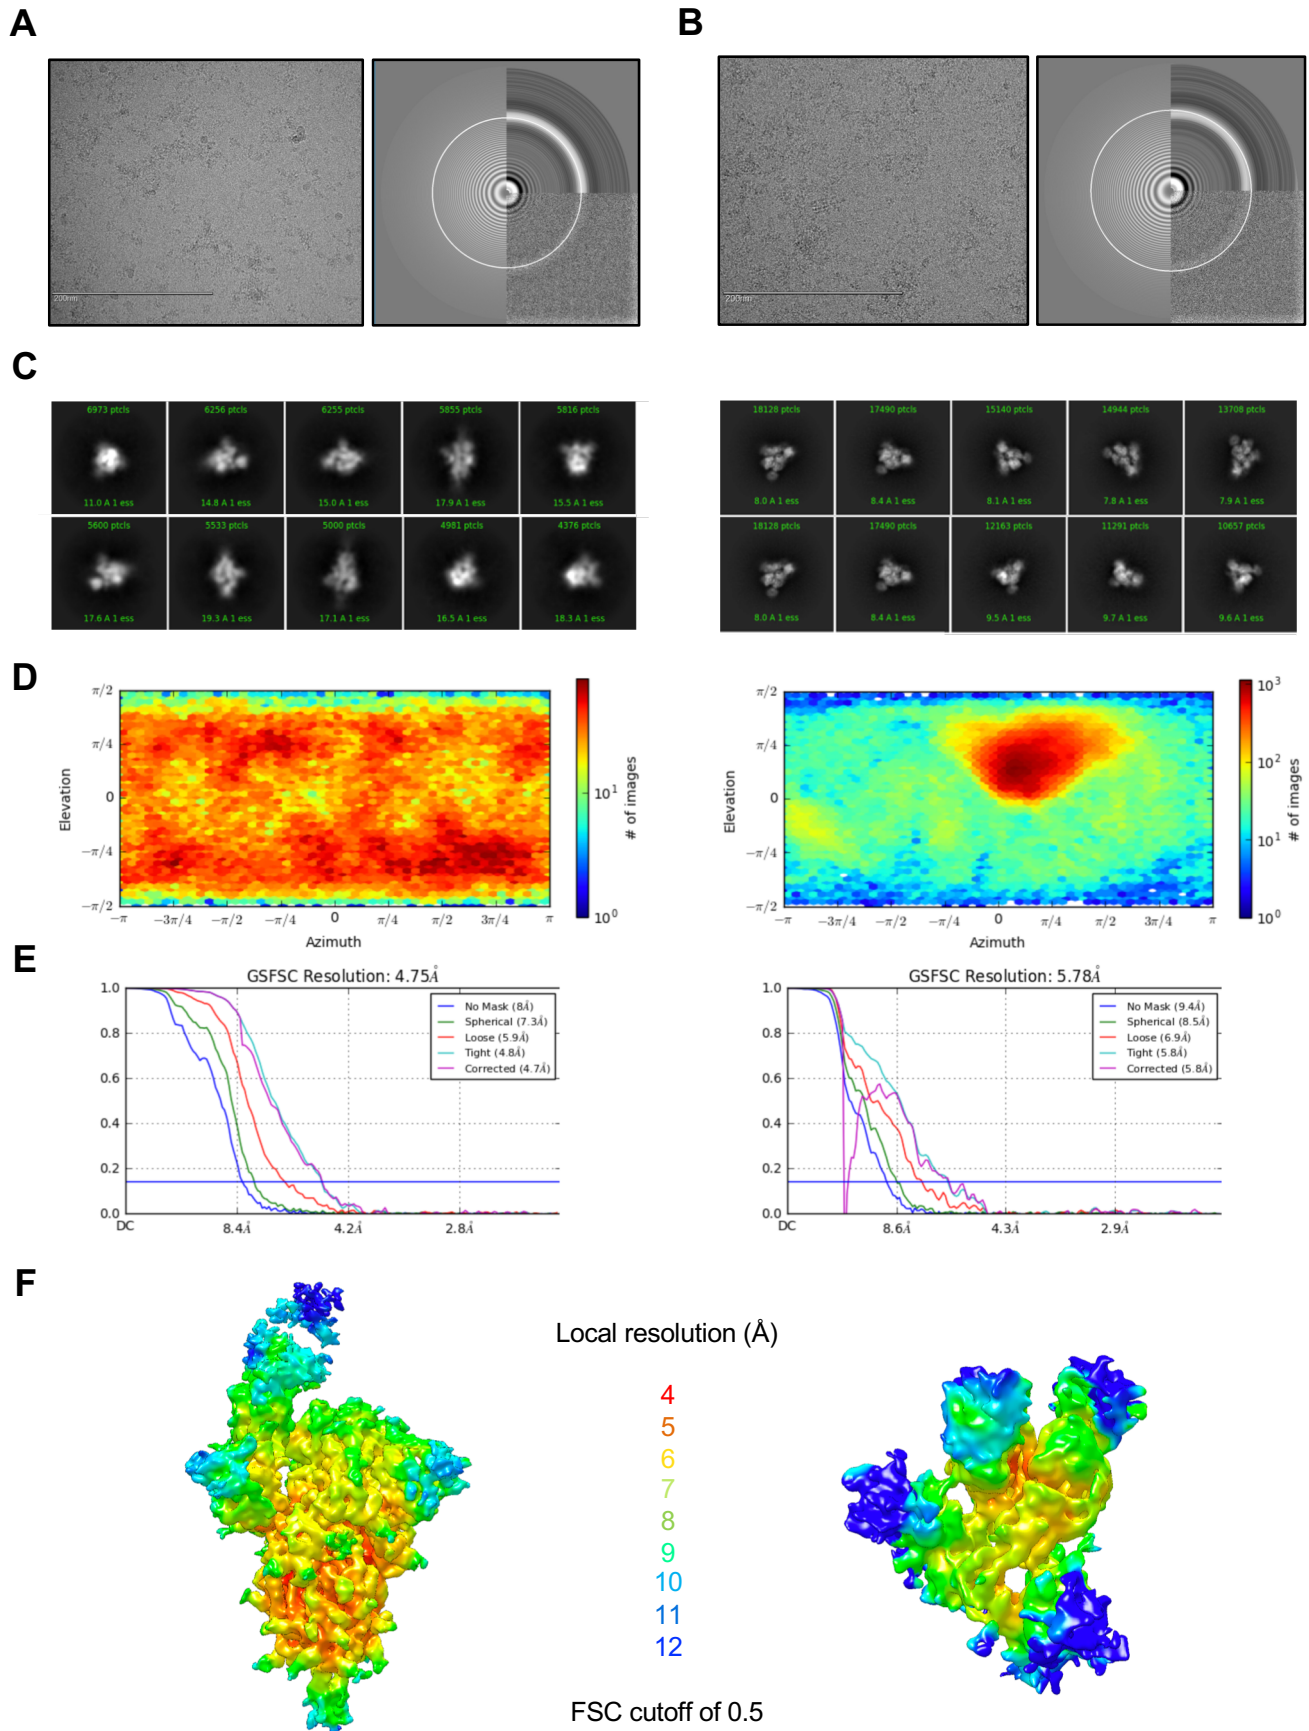

Supplementary Figure 3. IGHV3-53/3-66 class member extended characterization and biophysical analysis.

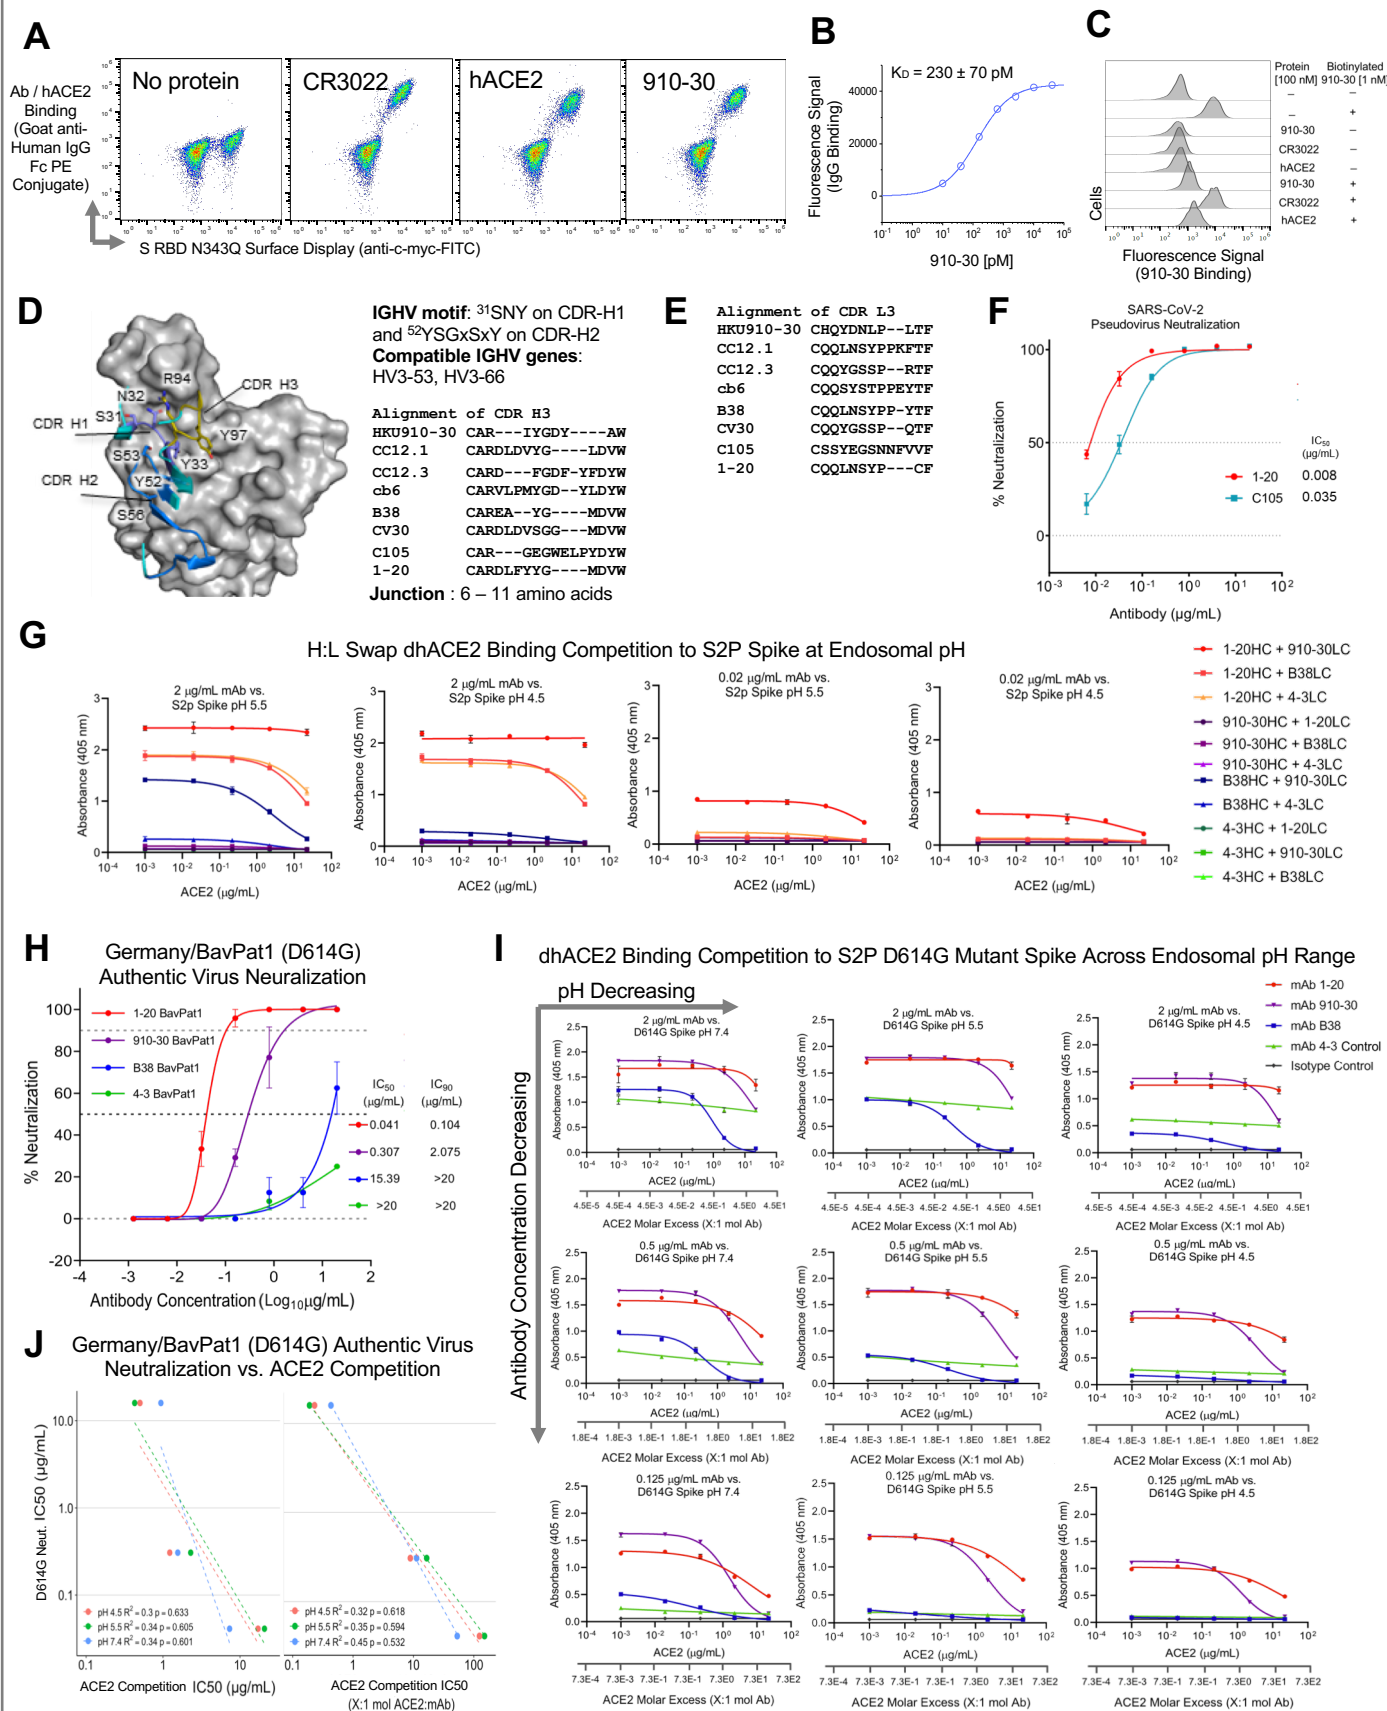

Supplementary Figure 4. Extended binding and neutralization analysis across multiple pH values.

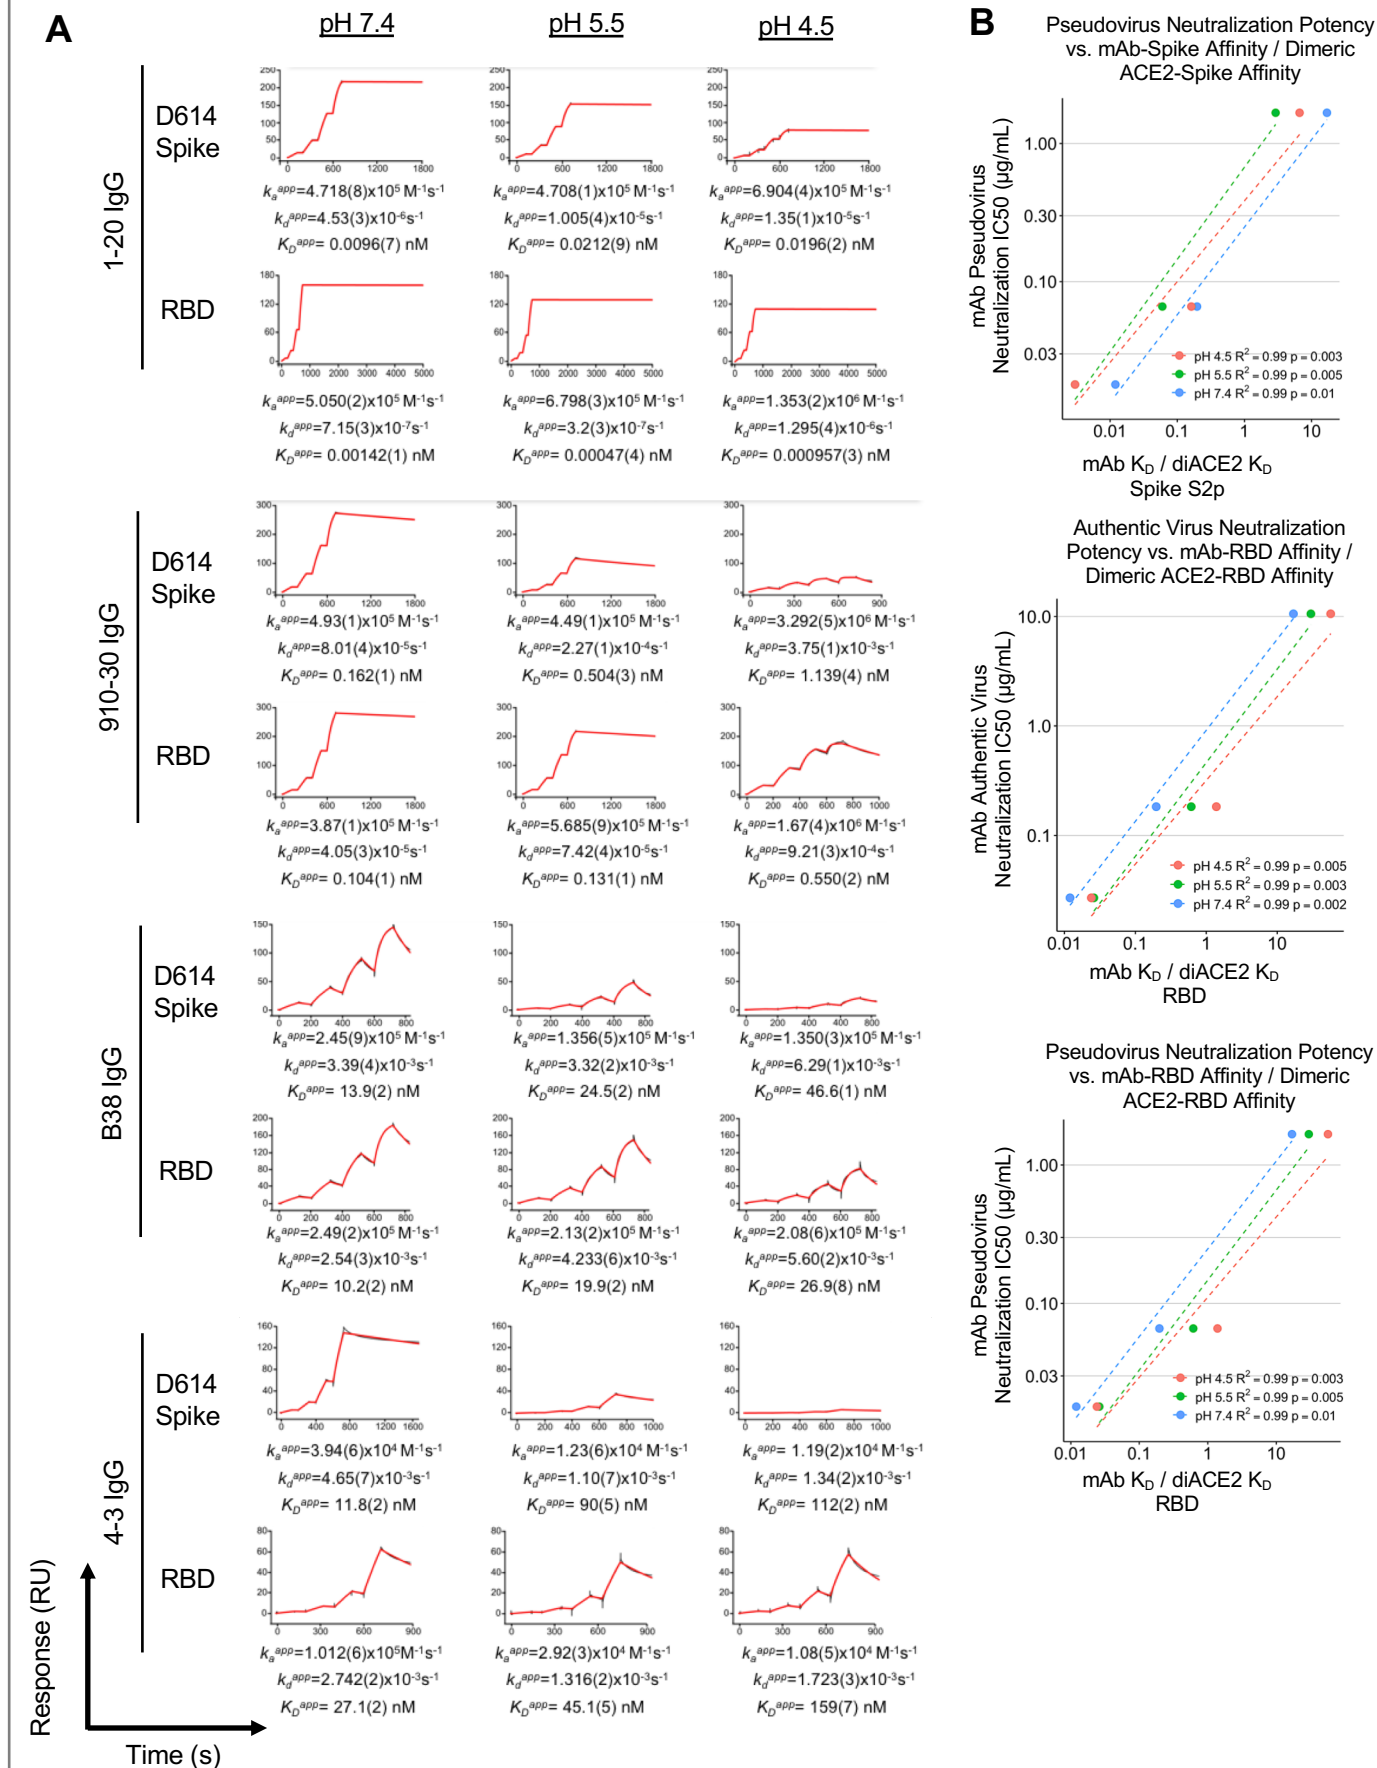

**Supplementary Table 1. Cryo-EM data collection and refinement statistics for 910-30 Fab in complex with SARS-CoV-2 spike at pH 5.5**

|                                                 | SARS-CoV-2 spike in complex<br>with 910-30 Fab at pH 5.5<br>(folded spike) | SARS-CoV-2 spike in complex<br>with 910-30 Fab at pH 5.5<br>(disrupted spike) |
|-------------------------------------------------|----------------------------------------------------------------------------|-------------------------------------------------------------------------------|
| <b>EMDB ID</b>                                  | EMD-23016                                                                  | EMD-23039                                                                     |
| <b>PDB ID</b>                                   | 7KS9                                                                       |                                                                               |
| <u>Data Collection</u>                          |                                                                            |                                                                               |
| Microscope                                      | FEI Titan Krios                                                            | FEI Titan Krios                                                               |
| Voltage (kV)                                    | 300                                                                        | 300                                                                           |
| Electron dose (e <sup>-</sup> /Å <sup>2</sup> ) | 41.92                                                                      | 41.92                                                                         |
| Detector                                        | Gatan K3 BioQuantum                                                        | Gatan K3 BioQuantum                                                           |
| Pixel Size (Å)                                  | 1.07                                                                       | 1.07                                                                          |
| Defocus Range (µm)                              | -0.8/-2.5                                                                  | -0.8/-2.5                                                                     |
| Magnification                                   | 81000                                                                      | 81000                                                                         |
| <u>Reconstruction</u>                           |                                                                            |                                                                               |
| Software                                        | cryoSPARC v2.15                                                            | cryoSPARC v2.15                                                               |
| Particles                                       | 88,315                                                                     | 188,269                                                                       |
| Symmetry                                        | C1                                                                         | C1                                                                            |
| Box size (pix)                                  | 400                                                                        | 400                                                                           |
| Resolution (Å) (FSC <sub>0.143</sub> )          | 4.75                                                                       | 5.78                                                                          |
| <u>Refinement</u>                               |                                                                            |                                                                               |
| Software                                        | Phenix 1.18                                                                |                                                                               |
| Protein residues                                | 3189                                                                       |                                                                               |
| Chimera CC                                      | 0.88                                                                       |                                                                               |
| EMRinger Score                                  | 0.55                                                                       |                                                                               |
| R.m.s. deviations                               |                                                                            |                                                                               |
| Bond lengths (Å)                                | 0.003                                                                      |                                                                               |
| Bond angles (°)                                 | 0.711                                                                      |                                                                               |
| <u>Validation</u>                               |                                                                            |                                                                               |
| Molprobrity score                               | 1.15                                                                       |                                                                               |
| Clash score                                     | 3.59                                                                       |                                                                               |
| Favored rotamers (%)                            | 100                                                                        |                                                                               |
| Ramachandran                                    |                                                                            |                                                                               |
| Favored regions (%)                             | 98.0                                                                       |                                                                               |
| Allowed regions (%)                             | 2.0                                                                        |                                                                               |
| Disallowed regions (%)                          | 0                                                                          |                                                                               |

## Supplementary Table 2

**Supplementary Table 2. List of IGHV3-53 / IGHV3-66 anti-SARS-CoV-2 antibodies in previously published articles.**

included as supplementary Excel file



## Supplementary Table 3

**Supplementary Table 3. Features of the IGHV3-53/3-66 antibodies investigated in this study.**

| Feature                                                     | Units                                        | Antibody                |                         |                         |                          |
|-------------------------------------------------------------|----------------------------------------------|-------------------------|-------------------------|-------------------------|--------------------------|
|                                                             |                                              | 1-20                    | 910-30                  | B38                     | 4-3                      |
| Relevant Spike S2P Affinity Values (pH 7.4)                 | <i>ka</i> (M <sup>-1</sup> s <sup>-1</sup> ) | 4.718 x 10 <sup>5</sup> | 4.39 x 10 <sup>5</sup>  | 2.45 x 10 <sup>5</sup>  | 3.94 x 10 <sup>4</sup>   |
|                                                             | <i>kd</i> (s <sup>-1</sup> )                 | 4.53 x 10 <sup>-6</sup> | 8.01 x 10 <sup>-5</sup> | 3.39 x 10 <sup>-3</sup> | 4.65 x 10 <sup>-3</sup>  |
|                                                             | <i>KD</i> (nM)                               | 0.0096                  | 0.162                   | 13.9                    | 11.8                     |
| Relevant RBD Affinity Values (pH 7.4)                       | <i>ka</i> (M <sup>-1</sup> s <sup>-1</sup> ) | 5.050 x 10 <sup>5</sup> | 3.87 x 10 <sup>5</sup>  | 2.49 x 10 <sup>5</sup>  | 1.012 x 10 <sup>5</sup>  |
|                                                             | <i>kd</i> (s <sup>-1</sup> )                 | 7.15 x 10 <sup>-7</sup> | 4.05 x 10 <sup>-5</sup> | 2.54 x 10 <sup>-3</sup> | 2.742 x 10 <sup>-3</sup> |
|                                                             | <i>KD</i> (nM)                               | 0.00142                 | 0.104                   | 10.2                    | 27.1                     |
| WT (D614) Pseudo Virus Neutralization potency (µg/mL)       | IC50                                         | 0.018                   | 0.066                   | 1.668                   | 5.582                    |
| WT (D614) Authentic Virus Neutralization potency (µg/mL)    | IC50                                         | 0.027                   | 0.183                   | 10.571                  | 18.54                    |
|                                                             | IC90                                         | 0.219                   | 1.436                   | >20                     | >20                      |
| Mutant D614G Authentic Virus Neutralization potency (µg/mL) | IC50                                         | 0.041                   | 0.307                   | 15.39                   | >20                      |
|                                                             | IC90                                         | 0.104                   | 2.075                   | >20                     | >20                      |
| Heavy chain                                                 | IGHV Gene                                    | IGHV3-53*01             | IGHV3-53*04             | IGHV3-53*04             | IGHV3-66*01              |
|                                                             | IGHJ Gene                                    | IGHJ6*02                | IGHJ5*02                | IGHJ6*02                | IGHJ6*01 F               |
|                                                             | IGHD Gene                                    | IGHD2-2*02              | IGHD4-17*01             | N/A                     | IGHD1-26*01              |
|                                                             | IGHV identity aa                             | 97.9%                   | 99.0%                   | 99.0%                   | 99.0%                    |
|                                                             | CDR-H3 seq (aa)                              | CARDLFYYGMDVW           | CARIYGDYAW              | CAREAYGMDVW             | CARDSSEGGPGYYGMDVW       |
|                                                             | CDR-H3 len (aa)                              | 13                      | 10                      | 11                      | 17                       |
| Light chain                                                 | IGKV Gene                                    | IGKV1-9*01              | IGKV1-33*01             | IGKV1-9*01              | IGKV1-9*01               |
|                                                             | IGKJ Gene                                    | IGKJ3*01                | IGKJ4*01                | IGKJ2*01                | IGKJ4*01                 |
|                                                             | IGKV identity aa                             | 100.0%                  | 97.9%                   | 97.9%                   | 100.0%                   |
|                                                             | CDR-L3 seq (aa)                              | CQQLNSYPCF              | CHQYDNLPLTF             | CQQLNSYPPYTF            | CQQLNSYLPLTF             |
|                                                             | CDR-L3 len (aa)                              | 10                      | 11                      | 12                      | 12                       |

**Supplementary Table 4. Heavy chain and light chain CDR1 and CDR2 sequence alignment for recognition signature related to Figures 3C, S3D, and S3E.**

included as supplementary Excel file
